# Supplementary material for: In situ CO2 capture and transformation into cyclic carbonates using flue gas
Source: Royal Society of Chemistry journal article supplement (doi:10.1039/d2gc04757h), 2023-01-01
Supplement: d2gc04757h1.pdf [file d2gc04757h1.pdf]

## Supporting Information

### ***In situ* CO<sub>2</sub> Capture and Transformation to Cyclic Carbonate using Flue Gas**

Haiying Ma,<sup>a,b</sup> Shujuan Liu,<sup>a</sup> Hongli Wang,<sup>a</sup> Guomin Li,<sup>a,b</sup> Kang Zhao,<sup>a</sup> Xinjiang Cui<sup>a</sup> and Feng Shi\*<sup>a</sup>

- a. State Key Laboratory for Oxo Synthesis and Selective Oxidation, Lanzhou Institute of Chemical Physics, Chinese Academy of Sciences, Lanzhou, 730000, P.R. China.
- b. University of Chinese Academy of Sciences, No. 19A, Yuquanlu, Beijing, 100049, P.R. China.

Corresponding author E-mail: fshi@licp.cas.cn

# Contents

|                                                                                     |    |
|-------------------------------------------------------------------------------------|----|
| 1. Experimental .....                                                               | 3  |
| 1.1 Materials.....                                                                  | 3  |
| 1.2 Synthesis of PP <sub>1,4</sub> Br.....                                          | 3  |
| 1.3 Coupling reactions of CO <sub>2</sub> and epoxides. ....                        | 3  |
| 1.4 Catalyst recycling experiments. ....                                            | 3  |
| 1.5 Investigation of the water-resistance.....                                      | 3  |
| 1.6 Scaled-up reactions of coupling reactions of CO <sub>2</sub> and epoxides. .... | 3  |
| 1.7 Analytic measurements .....                                                     | 4  |
| 2. Supplementary Table .....                                                        | 5  |
| 3. NMR data of the products .....                                                   | 5  |
| 4. NMR spectra of the products .....                                                | 9  |
| 5. References .....                                                                 | 24 |

# 1. Experimental

## 1.1 Materials.

All chemicals were purchased from commercial sources and used without further treatment. Flue gas was purchased from Lanzhou Yulon Gas Co., Ltd where the flue gas is directly supplied from a coal power group and the Flue gas is CO<sub>2</sub> (19.4%), O<sub>2</sub> (1.8%), N<sub>2</sub> (78.8%).

## 1.2 Synthesis of PP<sub>1,4</sub>Br.

For the synthesis of the PP<sub>1,4</sub>Br, 10 mmol of 1-methylpiperidine (990 mg) and 100 mL ethanol were put into the round-bottomed flask, which was stirred in oil bath at 40 °C. Then 1.2 mmol n-butyl bromide (164 mg) was slowly added to the above solution, and the solution was continuously stirred for 24 h. Then, the ethanol and excess n-butyl bromide were removed by distillation at 80 °C using a rotary evaporator. It was then crystallized in acetone to produce a white powder. The resultant solid was washed 3 times with acetone to obtain pure PP<sub>1,4</sub>Br.

## 1.3 Coupling reactions of CO<sub>2</sub> and epoxides.

Styrene oxide (1200 mg, 10 mmol), PP<sub>1,4</sub>Br (100 mg, 0.42 mmol) and ZnCl<sub>2</sub> (20.4 mg, 0.15 mmol) were put into a glass tube which was placed in a 100 ml stainless-steel autoclave. After sealing, the autoclave was purged and charged with flue gas (typically 3.0 MPa). The reaction mixture was stirred at 60 °C for 18 h. After the reaction finished, the autoclave was cooled to room temperature and the excess gas was carefully released. Subsequently, the reaction mixture was diluted with 35 mL ethyl acetate and the reaction mixture was separated by centrifugation and analyzed quantitatively by a gas chromatograph (Agilent 7890A) equipped with a capillary column (HP-5) and an FID detector with biphenyl as an internal standard. The crude reaction mixture was concentrated by rot-vap and purified by column chromatography on a silica gel column to give the desired products.

## 1.4 Catalyst recycling experiments.

The used PP<sub>1,4</sub>Br/ZnCl<sub>2</sub> was separated by centrifugation and washed 3 times with ethyl acetate, followed dry at 60 °C for 4 h. The catalyst was then used for the next catalytic run. Styrene oxide (1200 mg, 10 mmol), PP<sub>1,4</sub>Br/ZnCl<sub>2</sub> (120 mg) were added into a glass tube which was placed in a 100 mL stainless-steel autoclave. Other steps were the same as the coupling reactions of CO<sub>2</sub> and epoxides.

## 1.5 Investigation of the water-resistance.

Styrene oxide (1200 mg, 10 mmol), PP<sub>1,4</sub>Br (100 mg, 0.42 mmol), quantified deionized water (1 mmol, 2 mmol, 3 mmol, 4 mmol, 5 mmol, 7 mmol, 10 mmol, 15 mmol) and ZnCl<sub>2</sub> (20.4 mg, 0.15 mmol) were put into a glass tube which was placed in a 100 mL stainless-steel autoclave. The other steps are the same as the coupling reactions of CO<sub>2</sub> and epoxides.

## 1.6 Scaled-up reactions of coupling reactions of CO<sub>2</sub> and epoxides.

PP<sub>1,4</sub>Br (4170 mg, 17.74 mmol), ZnCl<sub>2</sub> (851 mg, 6.26 mmol) and ethylene carbonate (325 g, 3.69 mol) were put into a glass tube which was placed in a 2 L stainless-steel autoclave. The mixture was stirred at 60 °C for 1 h. After stopping heating, the autoclave was cooled to room temperature. Styrene oxide (50 g, 0.417 mol) was added into the autoclave, and the reactor was purged and charged with flue gas up to 2.6 MPa followed by the addition of N<sub>2</sub> to 4.6 MPa. Afterward, the reaction mixture was heated and stirred at 60 °C for 18 h. After the reaction completed, the reactor was allowed to cool to room temperature. The gas was analyzed quantitatively for CO<sub>2</sub> by a gas chromatograph (Agilent 7890A) equipped with a capillary column (C Mol Sieve) and an TCD detector. The actual amount of CO<sub>2</sub> captured and converted is obtained from the mass after and before the reaction. The yield is obtained by dividing the amount of CO<sub>2</sub> actually captured and converted by the total amount of carbon dioxide injected.

PP<sub>1,4</sub>Br (6000 mg, 25.52 mmol), ZnCl<sub>2</sub> (1200 mg, 8.82 mmol) and ethylene carbonate (296 g, 3.36 mol) were put into a glass tube which was placed in a 2 L stainless-steel autoclave. The mixture was stirred at 60 °C for 1 h. After stopping heating, the autoclave was cooled to room temperature. Styrene oxide (72 g, 0.6 mol) was added into the autoclave. The reactor was purged and charged with flue gas up to 3.7 MPa. The other steps are the same as above.

PP<sub>1,4</sub>Br (7500 mg, 31.90 mmol), ZnCl<sub>2</sub> (1500 mg, 11.03 mmol) and ethylene carbonate (270 g, 3.07 mol) were put into a glass tube which was placed in a 2 L stainless-steel autoclave. The mixture was stirred at 60 °C for 1 h. After stopping heating, the autoclave was cooled to room temperature. Styrene oxide (90 g, 0.750 mmol) was added into the autoclave. The reactor was purged and charged with flue gas up to 4.8 MPa. The other steps are the same as above.

## 1.7 Analytic measurements

The liquid nuclear magnetic resonance spectra (NMR) were recorded on a Bruker Avance™ III 400 MHz in deuterated chloroform unless otherwise noted. Data are reported in parts per million (ppm) as follows: chemical shift, multiplicity (s = singlet, d = doublet, t = triplet, q = quartet, quint = quintet, m = multiplet, dd = doublet of doublet and br = broad signal), coupling constant in Hz and integration.

The contents of Zn in the catalysts after use were measured by continuous light source atomic absorption spectrometer (CS AAS), using the Jena contrAA700.

## 2. Supplementary Table

Table S1. Screening of the pressure. <sup>a</sup>

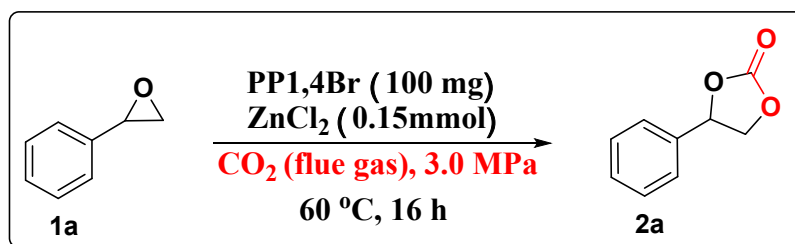

| Entry | Pressure (MPa) | Yield(%) <sup>b</sup> |
|-------|----------------|-----------------------|
| 1     | 2              | 57                    |
| 2     | 3              | 90                    |
| 3     | 4              | 90                    |

<sup>a</sup> Reaction conditions: 10 mmol substrates, ZnCl<sub>2</sub> (0.15 mmol), 100 mg catalyst, 3.0 MPa flue gas, 60 °C, 18 h. <sup>b</sup> The yield of the product 2a were calculated by GC.

Table S2. Zn contents.

| Cycle | Zn contents (mg) |
|-------|------------------|
| 1     | 9.8              |
| 2     | 9.8              |
| 3     | 9.8              |
| 4     | 9.5              |

## 3. NMR data of the products

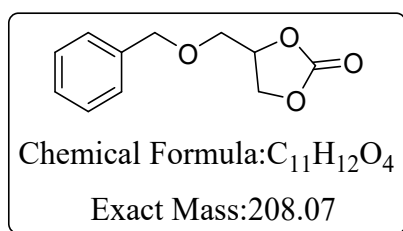

4-((benzyloxy)methyl)-1,3-dioxolan-2-one (**2b**)<sup>1</sup>: white solid, 2.060 g, 99% yield. <sup>1</sup>H NMR (400 MHz, CDCl<sub>3</sub>) δ 7.40 – 7.29 (m, 5H), 4.82 (m, 1H), 4.60 (q, *J* = 12.0 Hz, 2H), 4.52 – 4.36 (m, 2H), 3.67 (m, 2H). <sup>13</sup>C NMR (101 MHz, CDCl<sub>3</sub>) δ 155.18, 137.15, 128.69, 128.21, 127.87, 75.10, 73.79, 68.90, 66.40.

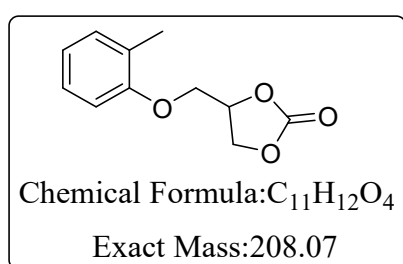

**4-((o-tolyloxy)methyl)-1,3-dioxolan-2-one (2c):** white solid, 1.903 g, 91% yield.  $^1\text{H NMR}$  (400 MHz,  $\text{CDCl}_3$ )  $\delta$  7.15 (d,  $J = 2.6$  Hz, 2H), 6.96 – 6.72 (m, 2H), 5.04 (dd,  $J = 8.2, 5.2$  Hz, 1H), 4.68 – 4.53 (m, 2H), 4.18 (m, 2H), 2.21 (s, 3H).  $^{13}\text{C NMR}$  (101 MHz,  $\text{CDCl}_3$ )  $\delta$  155.87, 154.94, 131.18, 127.18, 126.99, 121.75, 110.95, 74.36, 67.12, 66.35, 16.06.

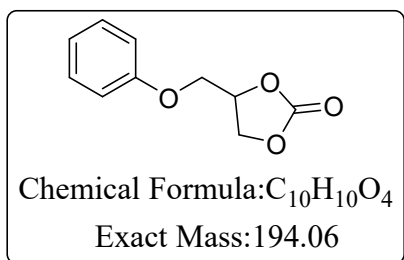

**4-(phenoxymethyl)-1,3-dioxolan-2-one (2d)<sup>1</sup>:** white solid, 1.488 g, 76% yield.  $^1\text{H NMR}$  (400 MHz,  $\text{CDCl}_3$ )  $\delta$  7.35 – 7.27 (m, 2H), 7.02 (dd,  $J = 10.6, 4.1$  Hz, 1H), 6.91 (m, 2H), 5.09 – 4.96 (m, 1H), 4.66 – 4.48 (m, 2H), 4.19 (m, 2H).  $^{13}\text{C NMR}$  (101 MHz,  $\text{CDCl}_3$ )  $\delta$  157.86, 154.81, 129.81, 122.09, 114.71, 74.24, 66.96, 66.34.

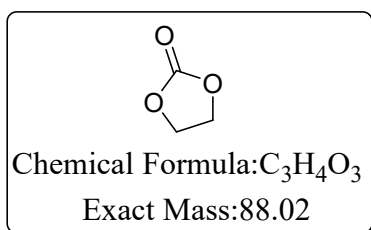

**1,3-dioxolan-2-one (2e)<sup>2</sup>:** white solid, 0.880 g, 100% yield.  $^1\text{H NMR}$  (400 MHz,  $\text{CDCl}_3$ )  $\delta$  4.54 (s, 4H).  $^{13}\text{C NMR}$  (101 MHz,  $\text{CDCl}_3$ )  $\delta$  155.60, 64.74.

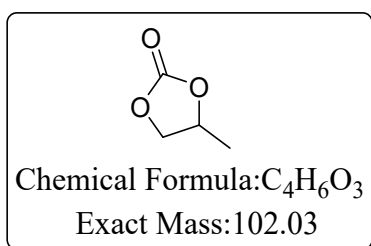

**4-methyl-1,3-dioxolan-2-one (2f)<sup>1</sup>:** colorless liquid, 0.992 g, 95% yield.  $^1\text{H NMR}$  (400 MHz,  $\text{CDCl}_3$ )  $\delta$  4.93 – 4.80 (m, 1H), 4.57 (dd,  $J = 8.3, 7.8$  Hz, 1H), 4.04 (dd,  $J = 8.4, 7.3$  Hz, 1H), 1.50 (d,  $J = 6.3$  Hz, 3H).  $^{13}\text{C NMR}$  (101 MHz,  $\text{CDCl}_3$ )  $\delta$  155.14, 73.64, 70.75, 19.53.

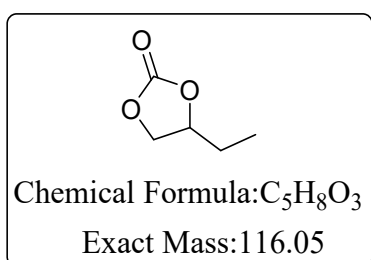

**4-ethyl-1,3-dioxolan-2-one (2g)<sup>1</sup>:** colorless liquid, 1.163 g, 98% yield. <sup>1</sup>H NMR (400 MHz, CDCl<sub>3</sub>) δ 4.80 – 4.63 (m, 1H), 4.59 – 4.49 (m, 1H), 4.10 (dd, *J* = 8.4, 7.0 Hz, 1H), 1.96 – 1.68 (m, 2H), 1.04 (t, *J* = 7.5 Hz, 3H). <sup>13</sup>C NMR (101 MHz, CDCl<sub>3</sub>) δ 155.23, 78.12, 69.12, 27.03, 8.58.

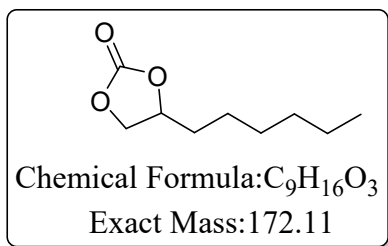

**4-hexyl-1,3-dioxolan-2-one (2h)<sup>1</sup>:** colorless liquid, 1.142 g, 66% yield. <sup>1</sup>H NMR (400 MHz, CDCl<sub>3</sub>) δ 4.71 (m, 1H), 4.53 (t, *J* = 8.1 Hz, 1H), 4.07 (dd, *J* = 8.3, 7.3 Hz, 1H), 1.91 – 1.61 (m, 2H), 1.53 – 1.23 (m, 8H), 0.89 (t, *J* = 6.9 Hz, 3H). <sup>13</sup>C NMR (101 MHz, CDCl<sub>3</sub>) δ 155.22, 77.48, 69.51, 33.99, 31.62, 28.90, 24.43, 22.56, 14.10.

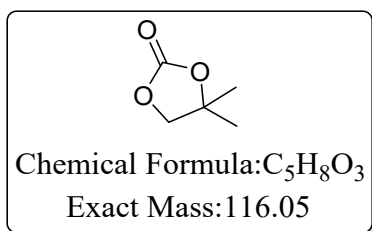

**4,4-dimethyl-1,3-dioxolan-2-one (2i)<sup>1</sup>:** colorless liquid, 0.370 g, 32% yield. <sup>1</sup>H NMR (400 MHz, CDCl<sub>3</sub>) δ 4.16 (s, 2H), 1.53 (s, 6H). <sup>13</sup>C NMR (101 MHz, CDCl<sub>3</sub>) δ 154.73, 81.81, 75.51, 26.18.

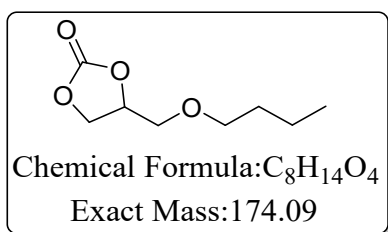

**4-(butoxymethyl)-1,3-dioxolan-2-one (2j)<sup>3</sup>:** yellowish liquid, 1.704 g, 97% yield. <sup>1</sup>H NMR (400 MHz, CDCl<sub>3</sub>) δ 4.91 – 4.74 (m, 1H), 4.50 (t, *J* = 8.3 Hz, 1H), 4.40 (dd, *J* = 8.3, 6.1 Hz, 1H), 3.64 (m, 2H), 3.51 (t, *J* = 6.5 Hz, 2H), 1.56 (m, 2H), 1.36 (m, 2H), 0.92 (t, *J* = 7.4 Hz, 3H). <sup>13</sup>C NMR (101 MHz, CDCl<sub>3</sub>) δ 155.12, 75.24, 71.97, 69.71, 66.40, 31.60, 19.23, 13.92.

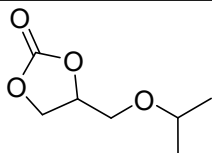

Chemical Formula:  $C_7H_{12}O_4$   
Exact Mass: 160.07

**4-(isopropoxymethyl)-1,3-dioxolan-2-one (2k)<sup>2</sup>:** colorless liquid, 1.522 g, 95% yield. <sup>1</sup>H NMR (400 MHz, CDCl<sub>3</sub>) δ 4.81 (m, 1H), 4.50 (t, *J* = 8.3 Hz, 1H), 4.39 (dd, *J* = 8.2, 6.1 Hz, 1H), 3.73 – 3.54 (m, 3H), 1.17 (d, *J* = 6.0 Hz, 6H). <sup>13</sup>C NMR (101 MHz, CDCl<sub>3</sub>) δ 155.20, 75.29, 73.04, 67.21, 66.53, 21.98, 21.88.

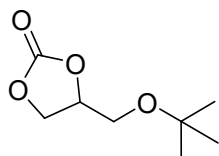

Chemical Formula:  $C_8H_{14}O_4$   
Exact Mass: 174.09

**4-(tert-butoxymethyl)-1,3-dioxolan-2-one (2l)<sup>1</sup>:** colorless liquid, 1.612 g, 92% yield. <sup>1</sup>H NMR (400 MHz, CDCl<sub>3</sub>) δ 4.87 – 4.68 (m, 1H), 4.48 (t, *J* = 8.2 Hz, 1H), 4.39 (dd, *J* = 8.2, 5.8 Hz, 1H), 3.58 (m, 2H), 1.20 (s, 9H). <sup>13</sup>C NMR (101 MHz, CDCl<sub>3</sub>) δ 155.29, 75.29, 73.98, 66.66, 61.38, 27.39.

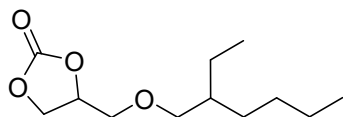

Chemical Formula:  $C_{12}H_{22}O_4$   
Exact Mass: 230.15

**4-(((2-ethylhexyl)oxy)methyl)-1,3-dioxolan-2-one (2m)<sup>3</sup>:** colorless liquid, 2.126 g, 92% yield. <sup>1</sup>H NMR (400 MHz, CDCl<sub>3</sub>) δ 4.81 (m, 1H), 4.49 (t, *J* = 8.3 Hz, 1H), 4.39 (m, 1H), 3.63 (m, 2H), 3.44 – 3.29 (m, 2H), 1.50 (m, 1H), 1.41 – 1.17 (m, 8H), 0.88 (dt, *J* = 10.1, 7.0 Hz, 6H). <sup>13</sup>C NMR (101 MHz, CDCl<sub>3</sub>) δ 155.11, 75.21, 74.97, 74.94, 70.02, 66.43, 39.70, 30.54, 30.51, 29.16, 23.86, 23.13, 14.18, 11.17, 11.16.

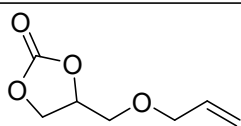

Chemical Formula:  $C_7H_{10}O_4$   
Exact Mass: 158.06

**4-((allyloxy)methyl)-1,3-dioxolan-2-one (2n)<sup>1</sup>:** yellowish liquid, 1.550 g, 98% yield. <sup>1</sup>H NMR (400 MHz, CDCl<sub>3</sub>) δ 5.88 (m, 1H), 5.26 (m, 2H), 4.98 – 4.74 (m, 1H), 4.51 (t, *J* = 8.4 Hz, 1H), 4.50 – 4.33 (m, 1H), 4.17



– 4.01 (m, 2H), 3.66 (m, 2H).  $^{13}\text{C}$  NMR (101 MHz,  $\text{CDCl}_3$ )  $\delta$  155.05, 133.77, 118.04, 75.14, 72.70, 68.95, 66.39.

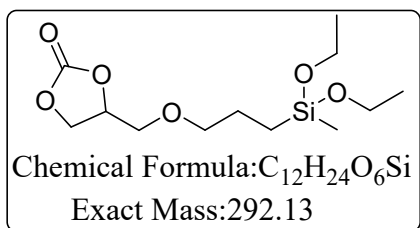

**4-((3-(diethoxy(methyl)silyl)propoxy)methyl)-1,3-dioxolan-2-one (2o)<sup>1</sup>**: yellowish liquid, 0.876 g, 60% yield.  $^1\text{H}$  NMR (400 MHz,  $\text{CDCl}_3$ )  $\delta$  5.04 – 4.67 (m, 1H), 4.60 – 4.29 (m, 2H), 3.88 – 3.39 (m, 8H), 1.80 – 1.58 (m, 2H), 1.23 (dd,  $J = 14.9, 7.9$  Hz, 6H), 0.61 (dd,  $J = 10.0, 6.8$  Hz, 2H), 0.12 (s, 3H).  $^{13}\text{C}$  NMR (101 MHz,  $\text{CDCl}_3$ )  $\delta$  155.06, 75.16, 74.45, 69.68, 66.41, 58.23, 23.02, 18.48, 9.87, -4.86.

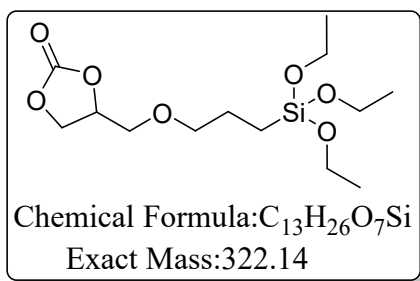

**4-((3-(triethoxysilyl)propoxy)methyl)-1,3-dioxolan-2-one (2p)<sup>1</sup>**: yellowish liquid, 0.879 g, 55% yield.  $^1\text{H}$  NMR (400 MHz,  $\text{CDCl}_3$ )  $\delta$  4.84 – 4.75 (m, 1H), 4.50 (t,  $J = 8.3$  Hz, 1H), 4.40 (dd,  $J = 8.2, 6.2$  Hz, 1H), 3.82 (q,  $J = 7.0$  Hz, 6H), 3.65 (dd,  $J = 17.7, 3.9$  Hz, 2H), 3.49 (m, 2H), 1.81 – 1.63 (m, 2H), 1.23 (t,  $J = 7.0$  Hz, 9H), 0.64 (dd,  $J = 9.5, 7.1$  Hz, 2H).  $^{13}\text{C}$  NMR (101 MHz,  $\text{CDCl}_3$ )  $\delta$  155.06, 75.14, 74.20, 69.66, 66.42, 58.50, 22.97, 18.39, 6.44.

#### 4. NMR spectra of the products

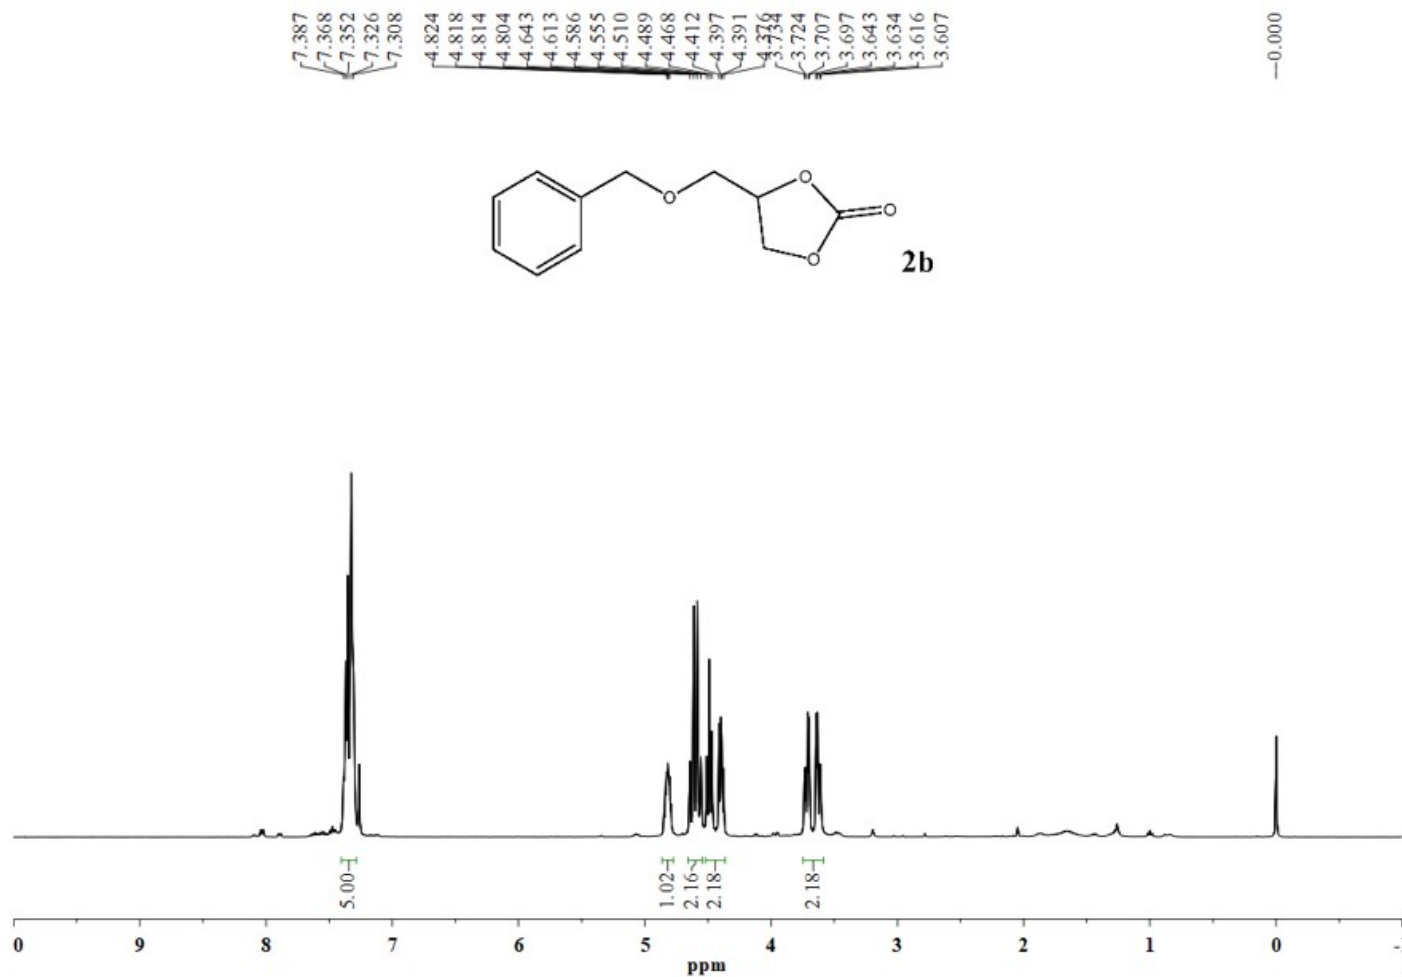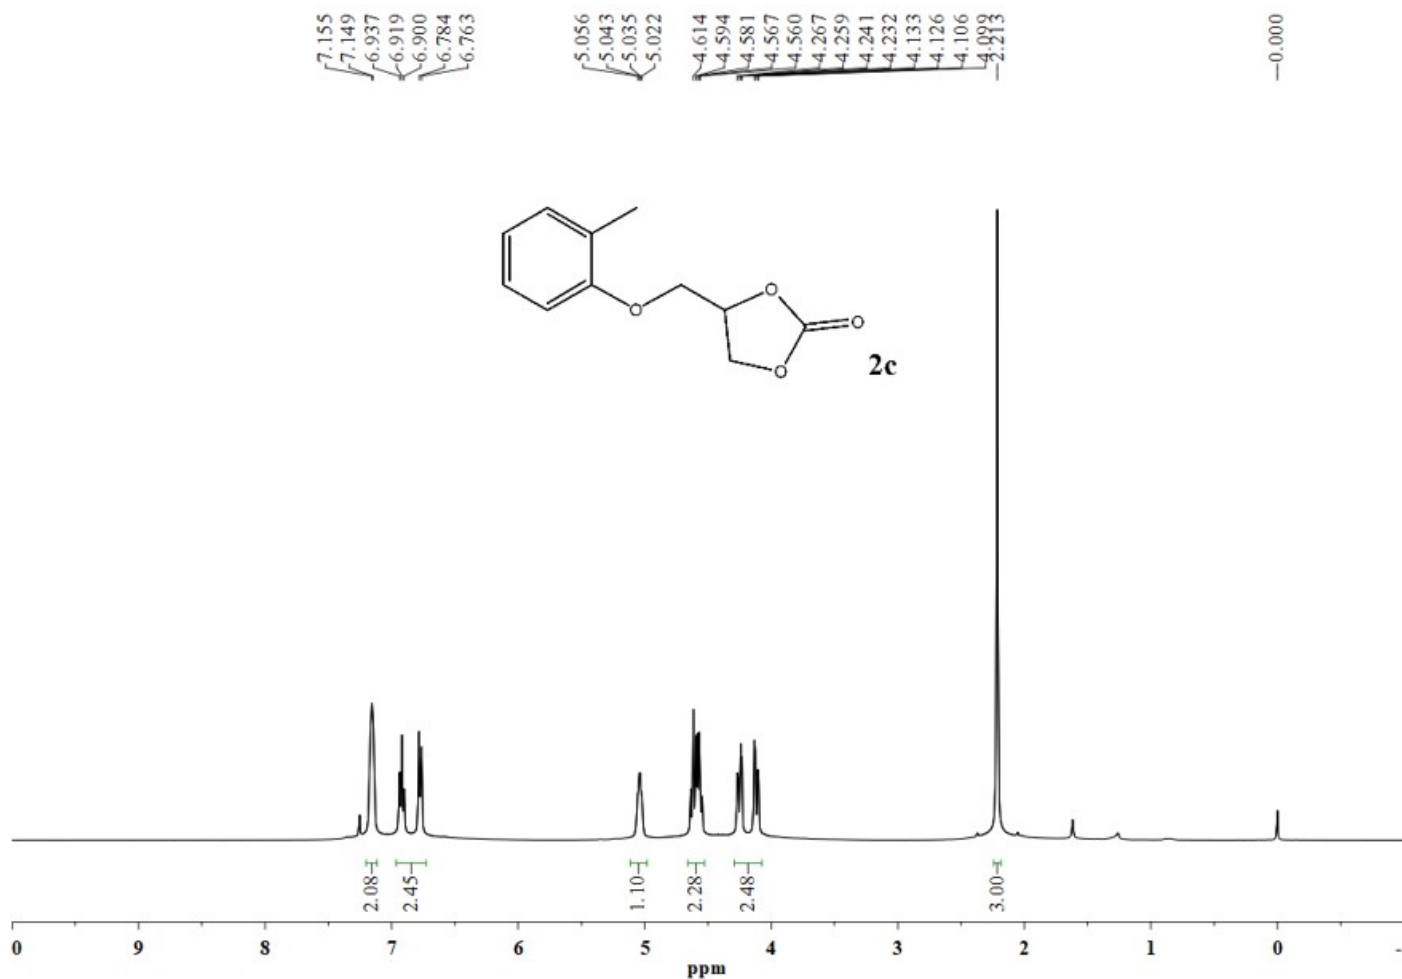

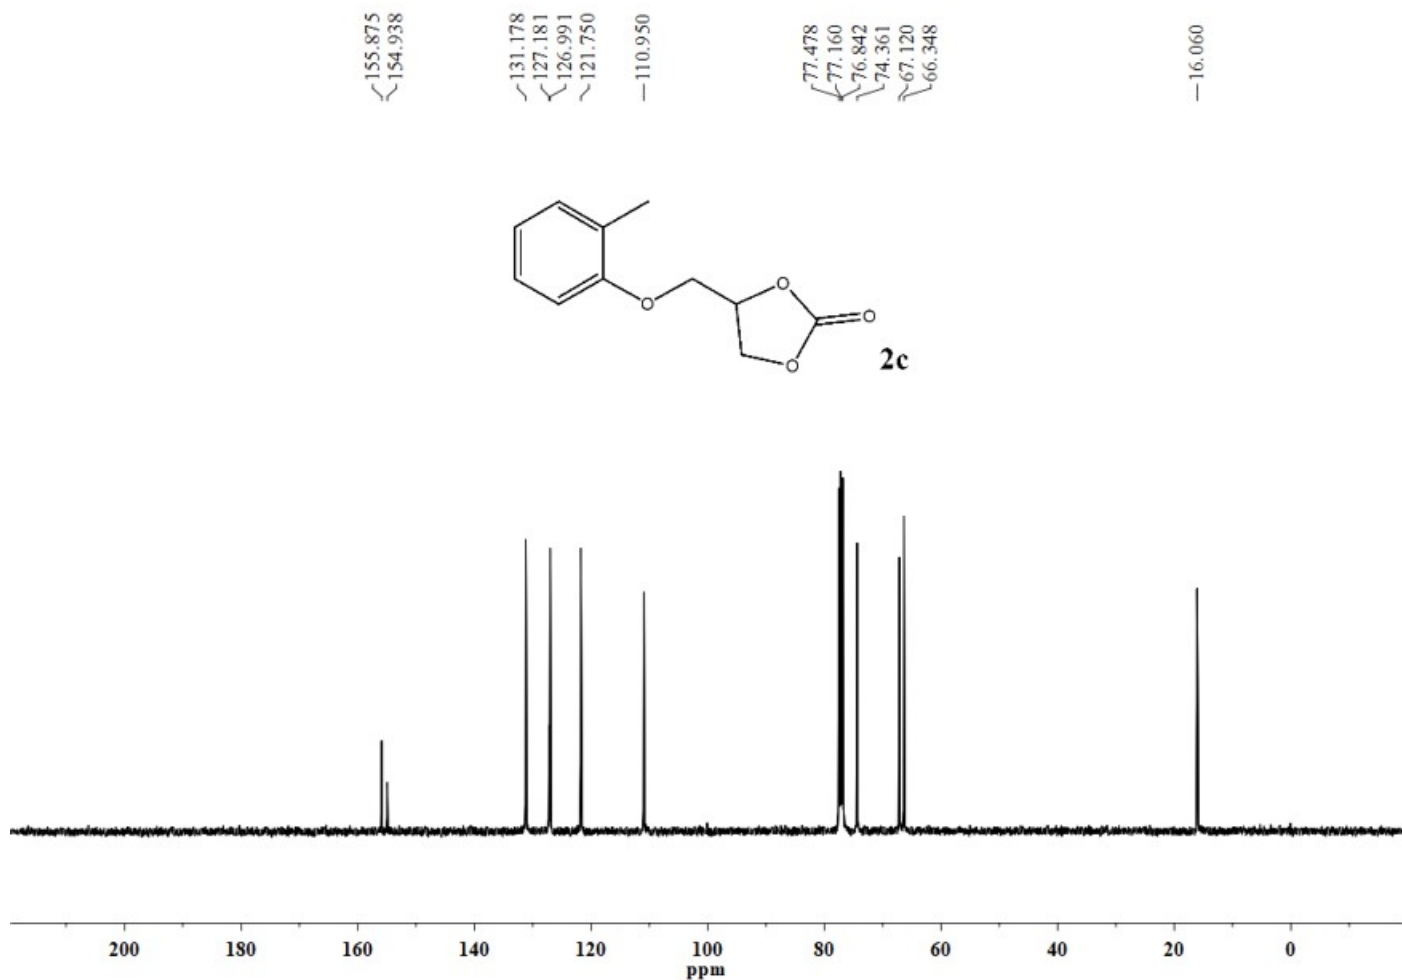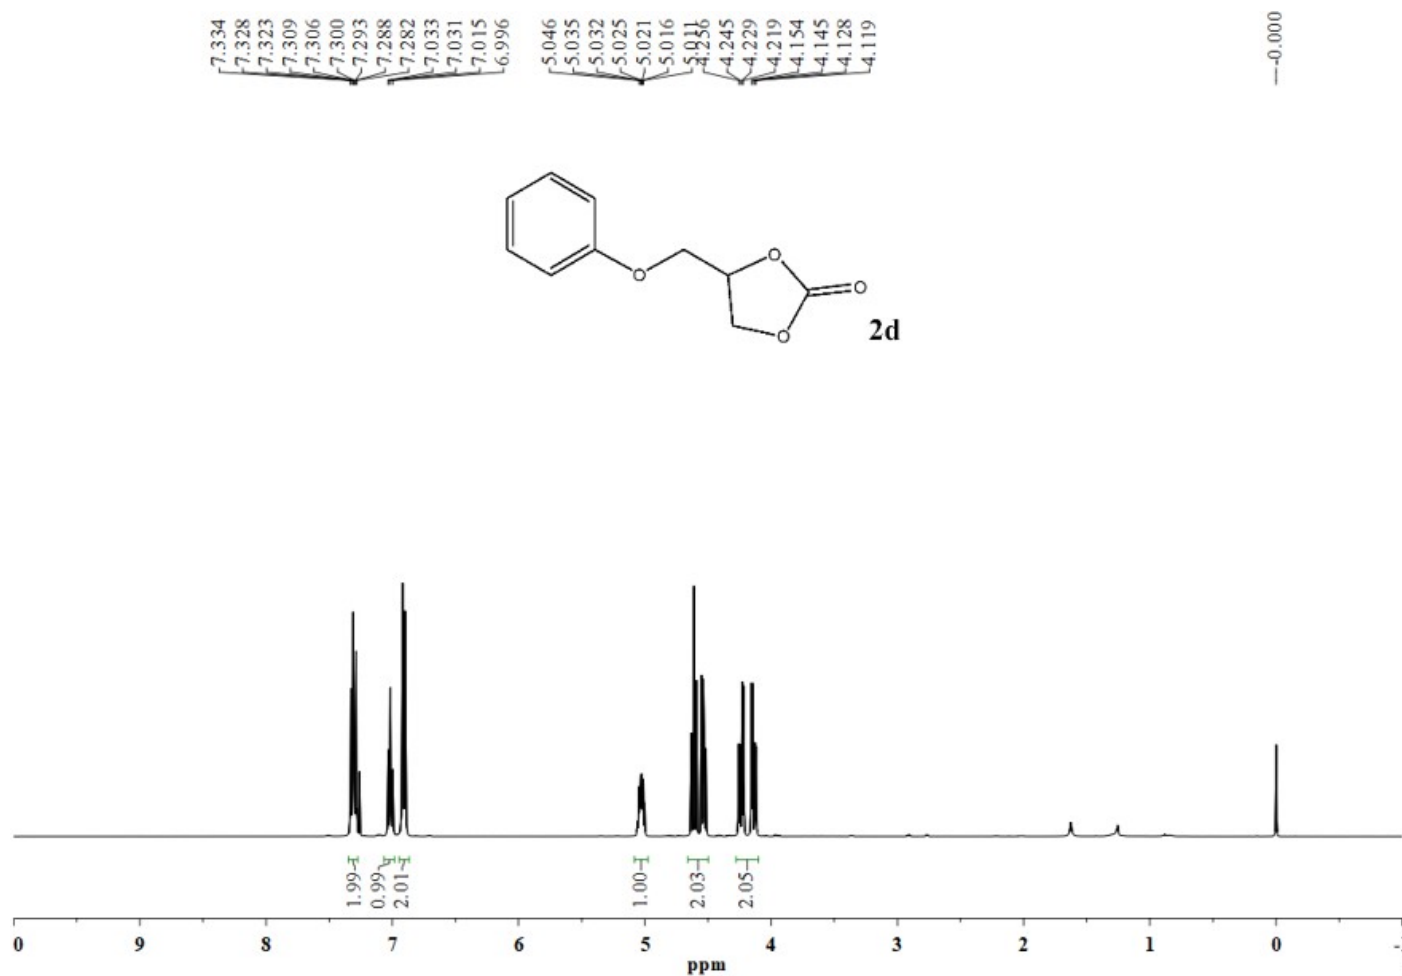

157.859  
154.808

129.810  
122.094  
114.707

77.477  
77.160  
76.842  
74.244  
66.965  
66.344

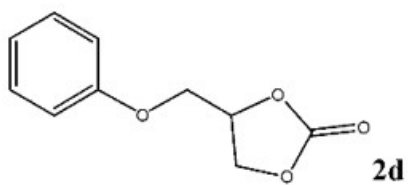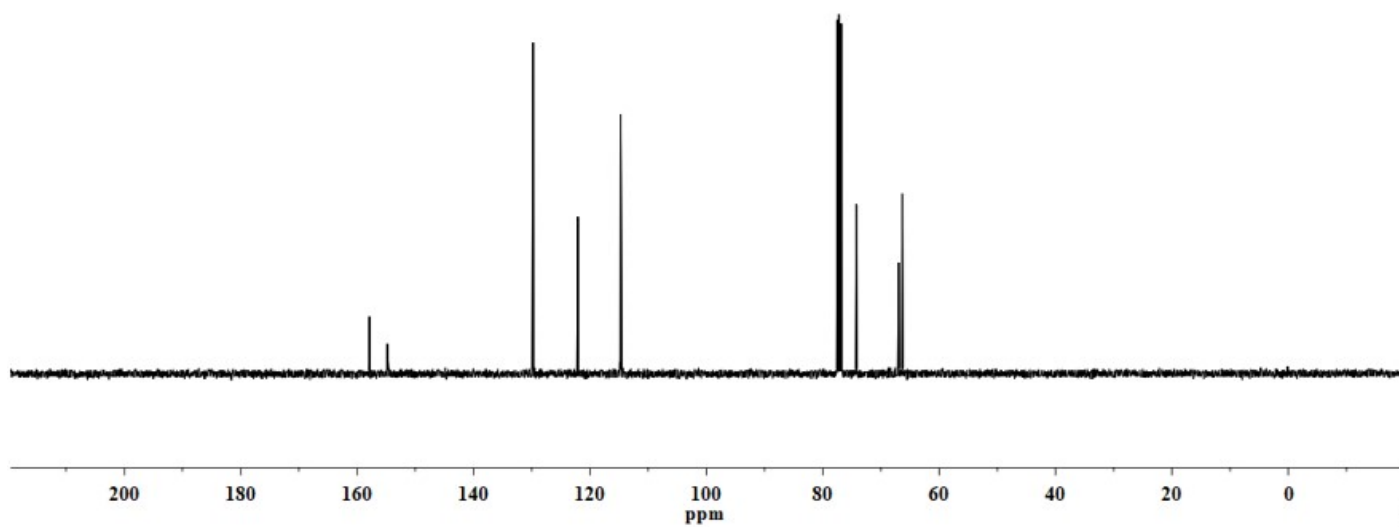

4.536

0.000

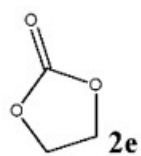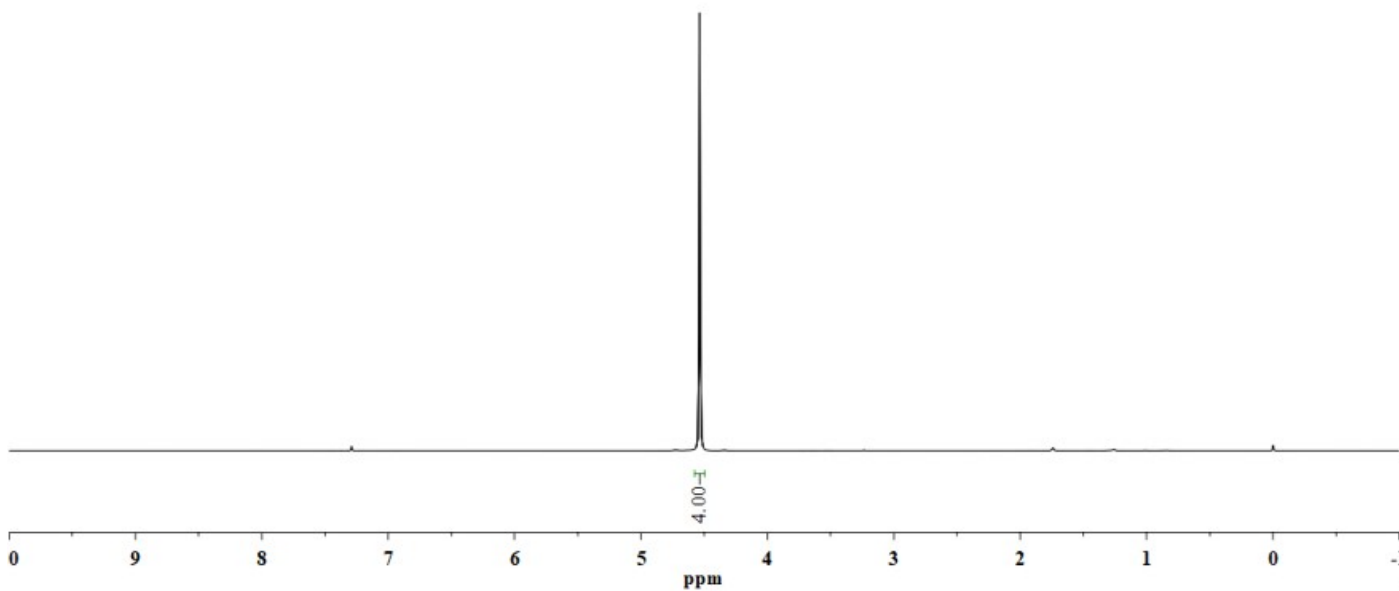

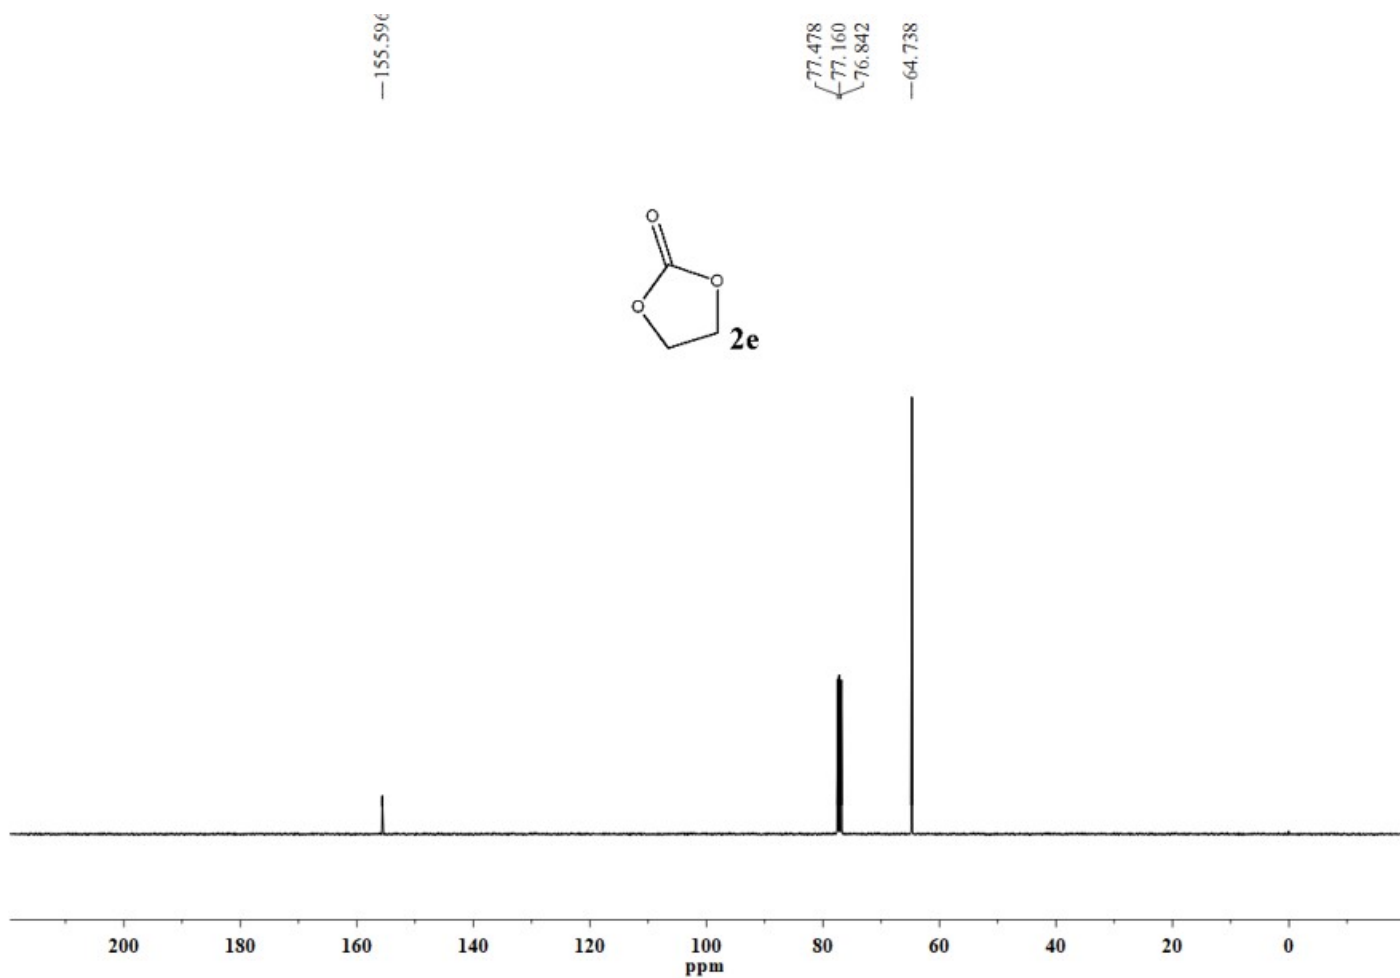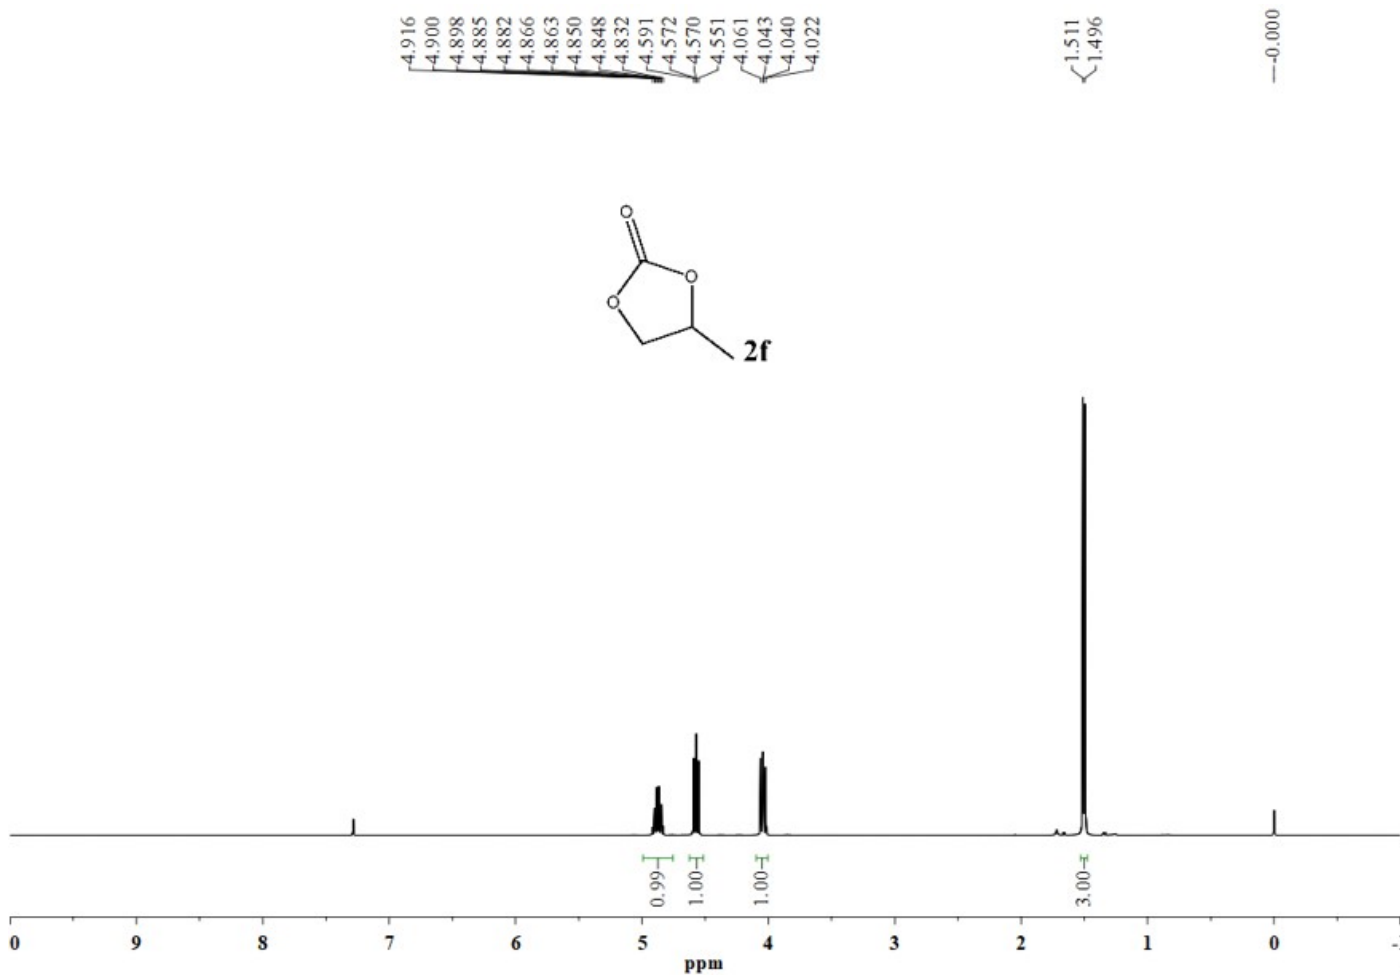

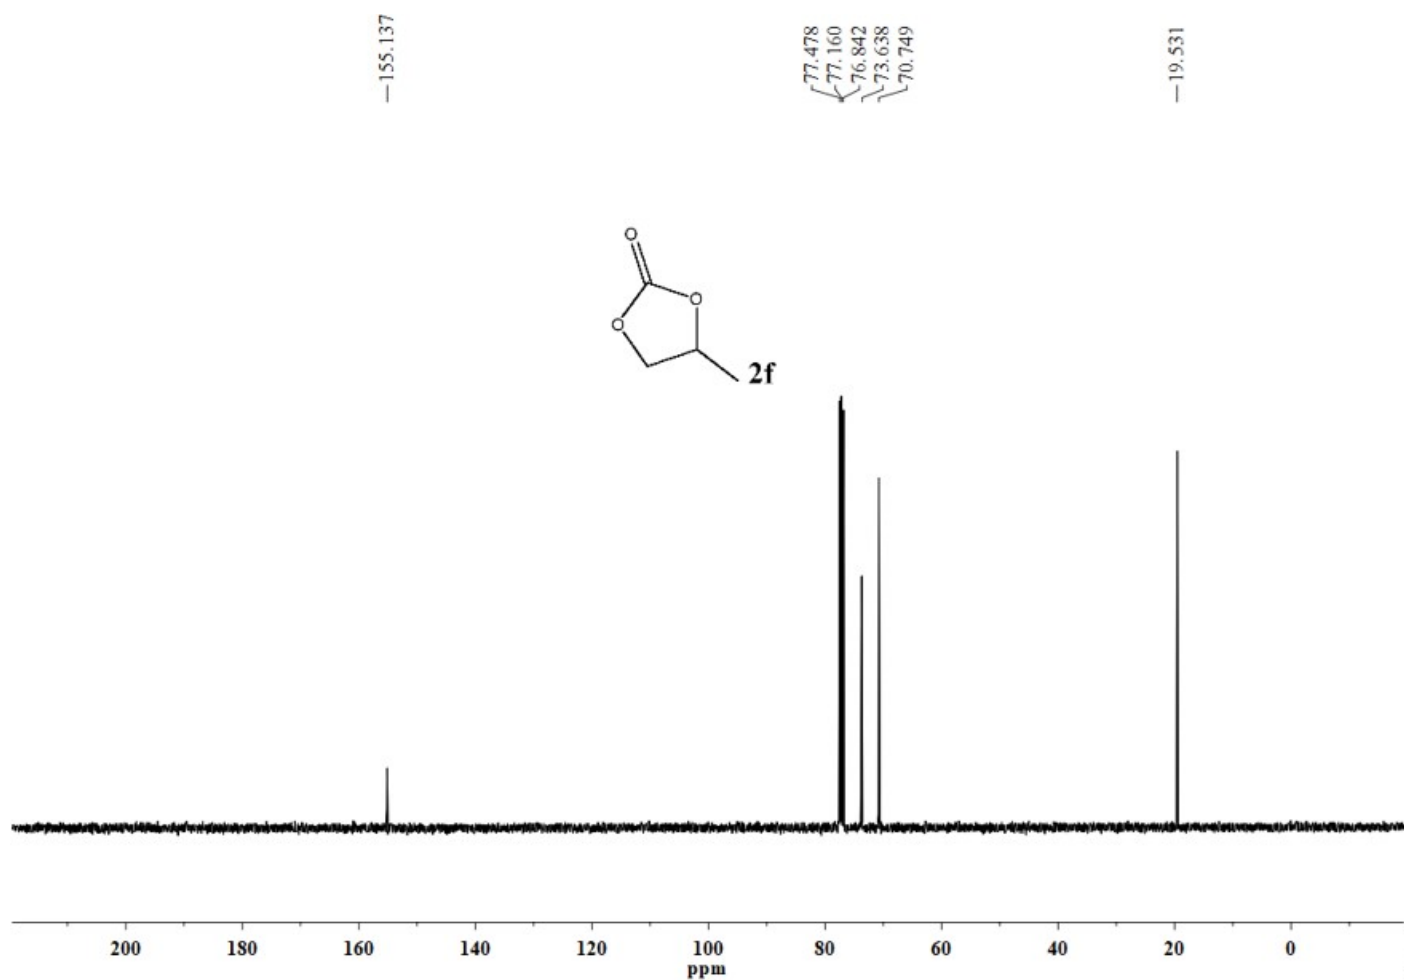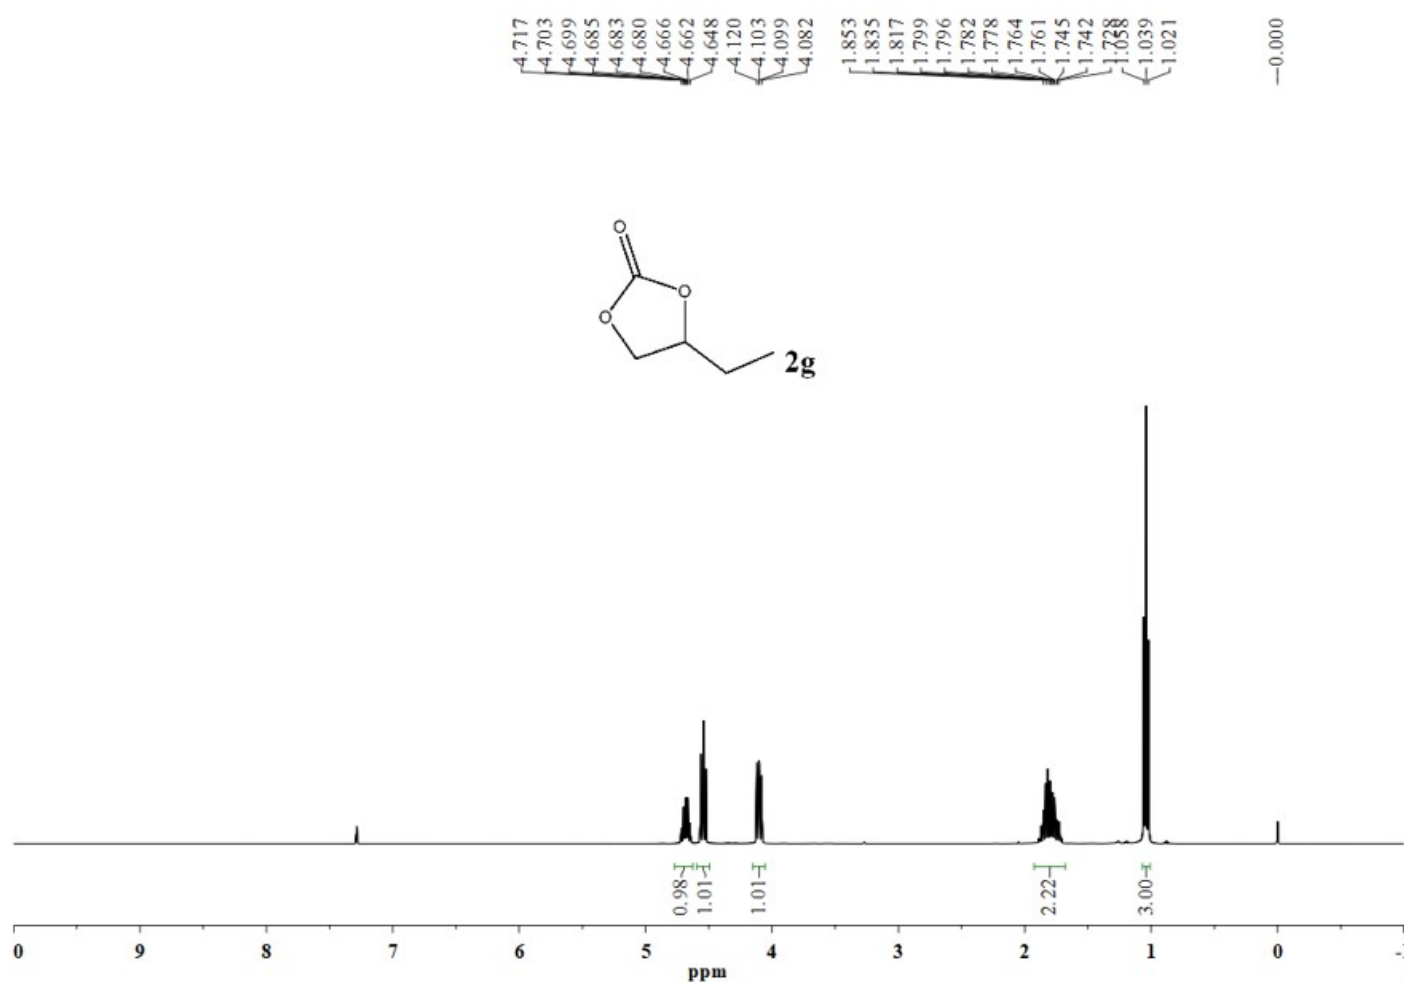

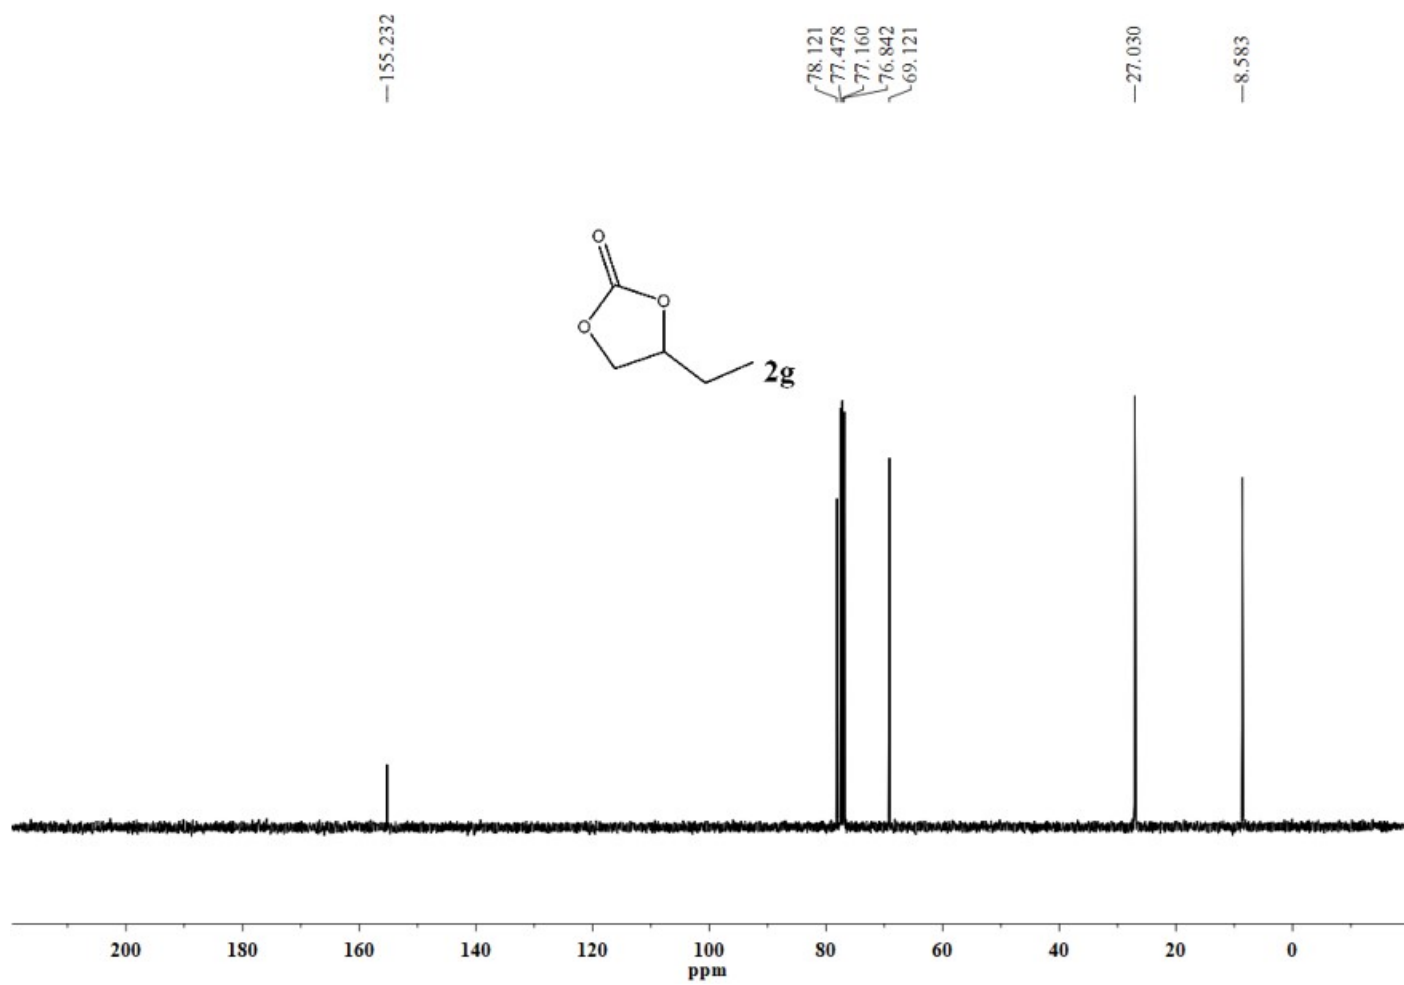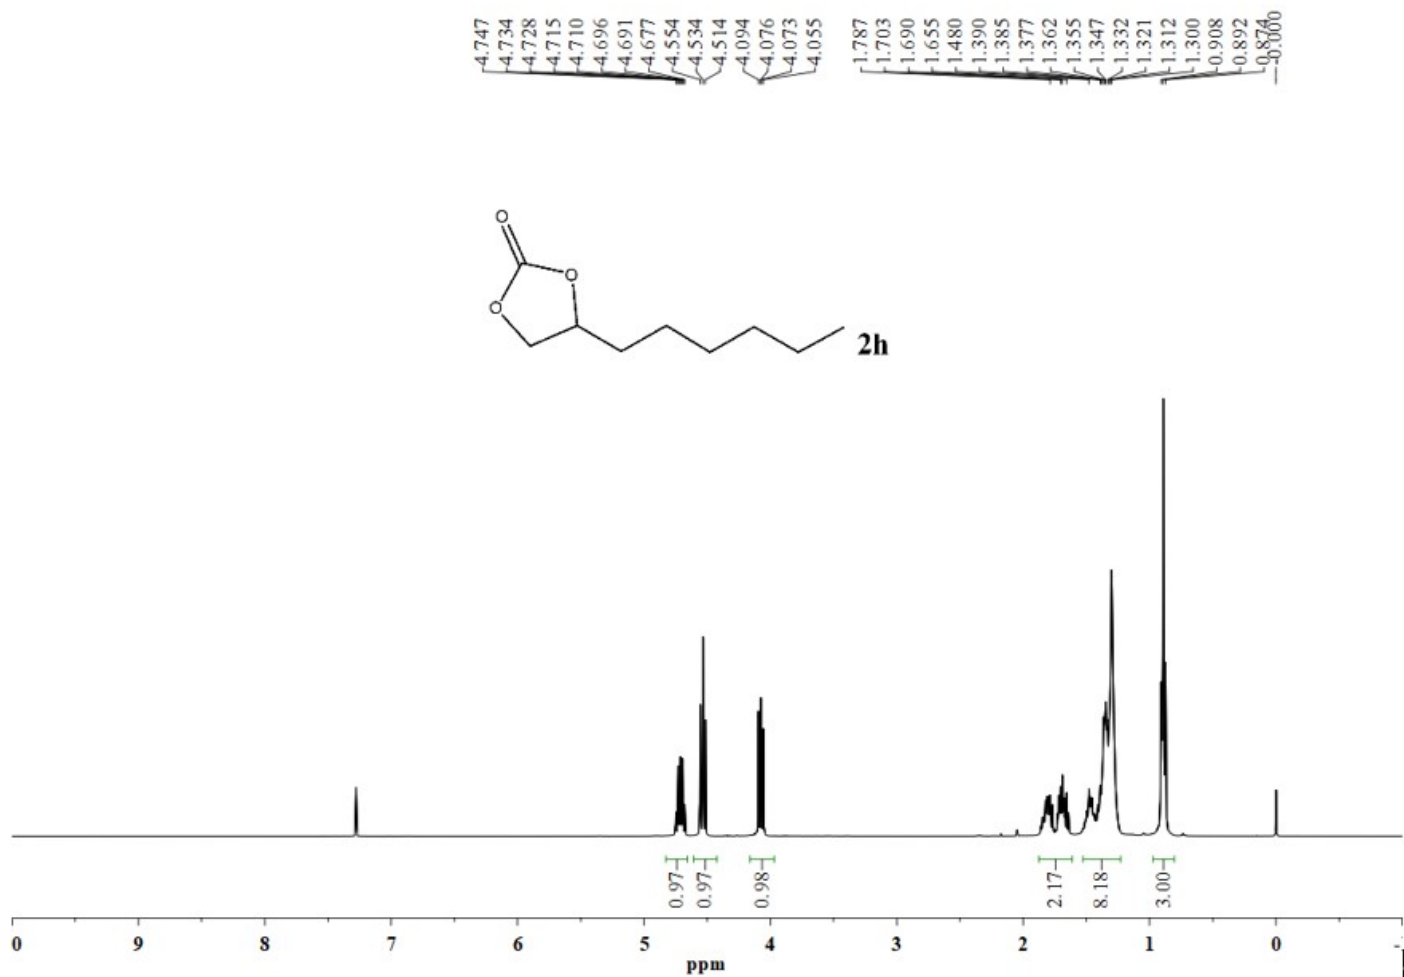

-155.219

77.477  
77.184  
77.160  
76.842  
69.514

33.992  
31.617  
28.901  
24.432  
22.564  
14.100

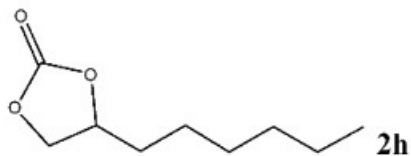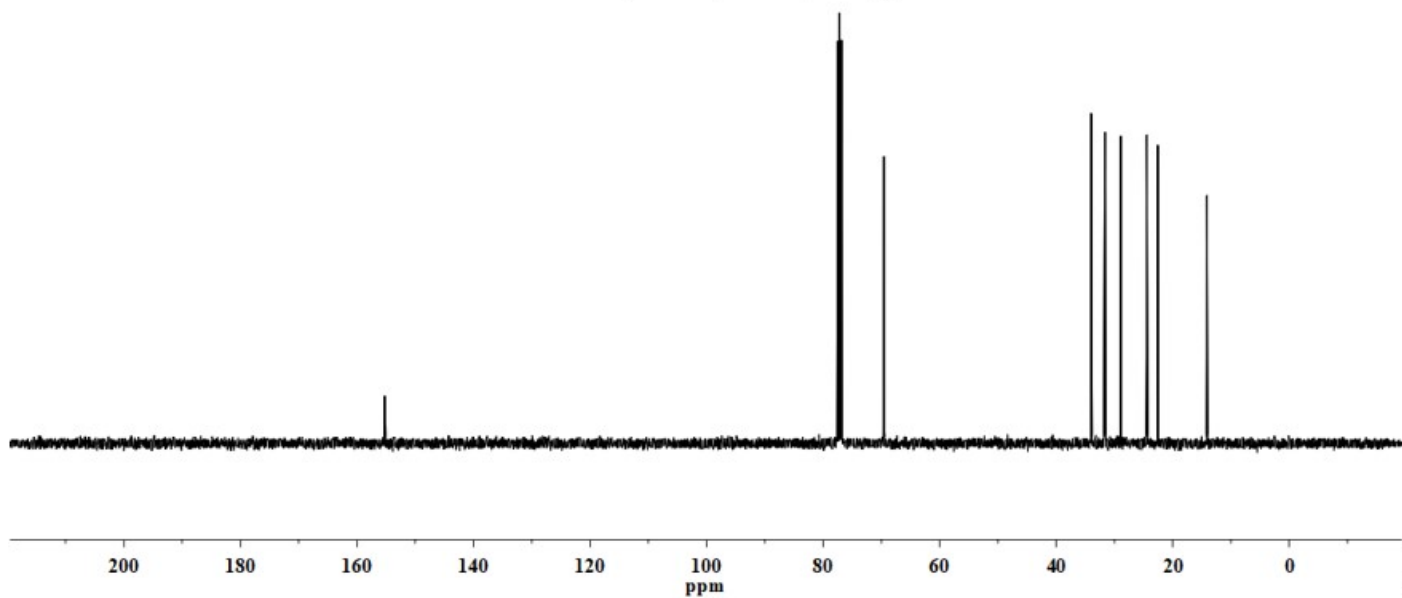



-4.162

-1.534

-0.000

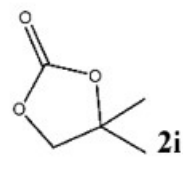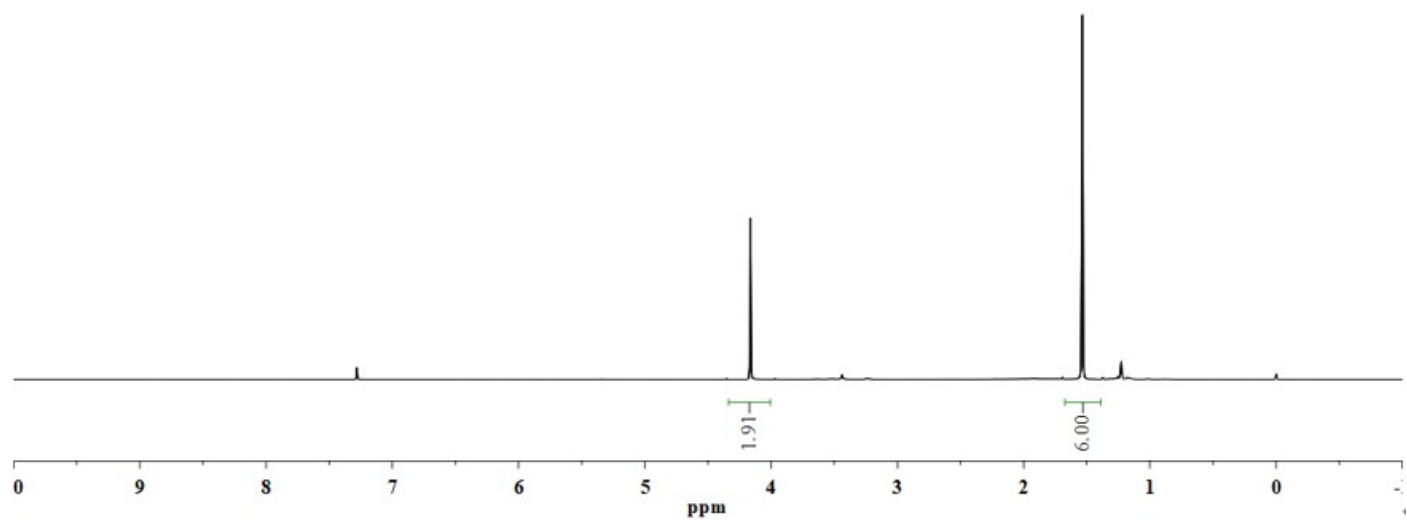

-154.726

81.813  
77.477  
77.160  
76.842  
75.509

-26.176

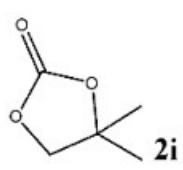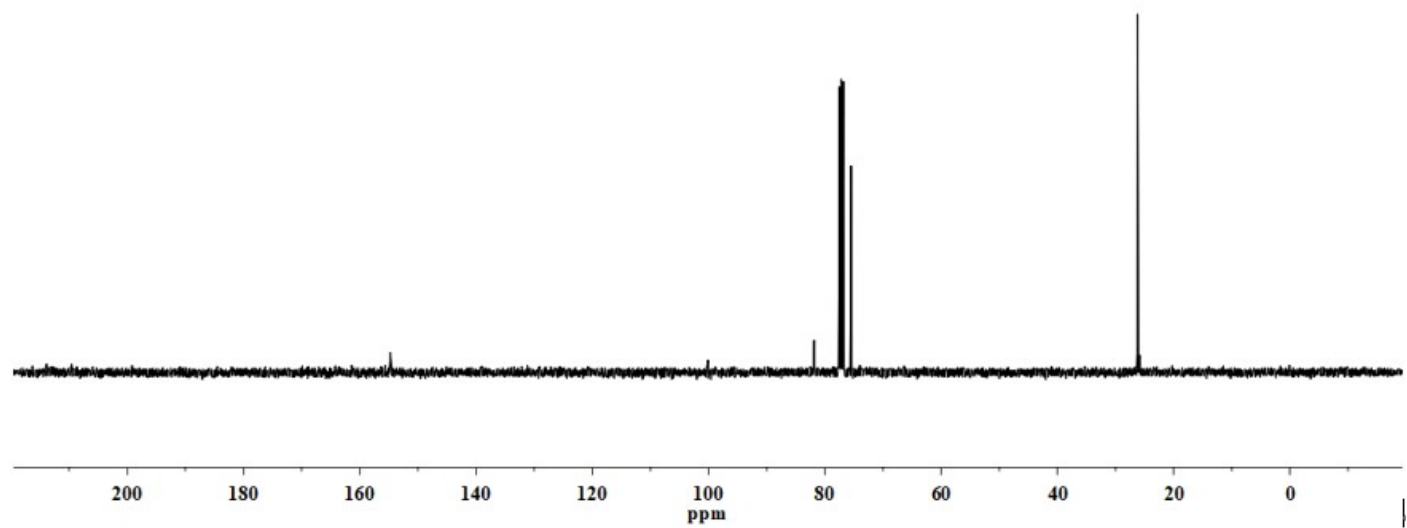

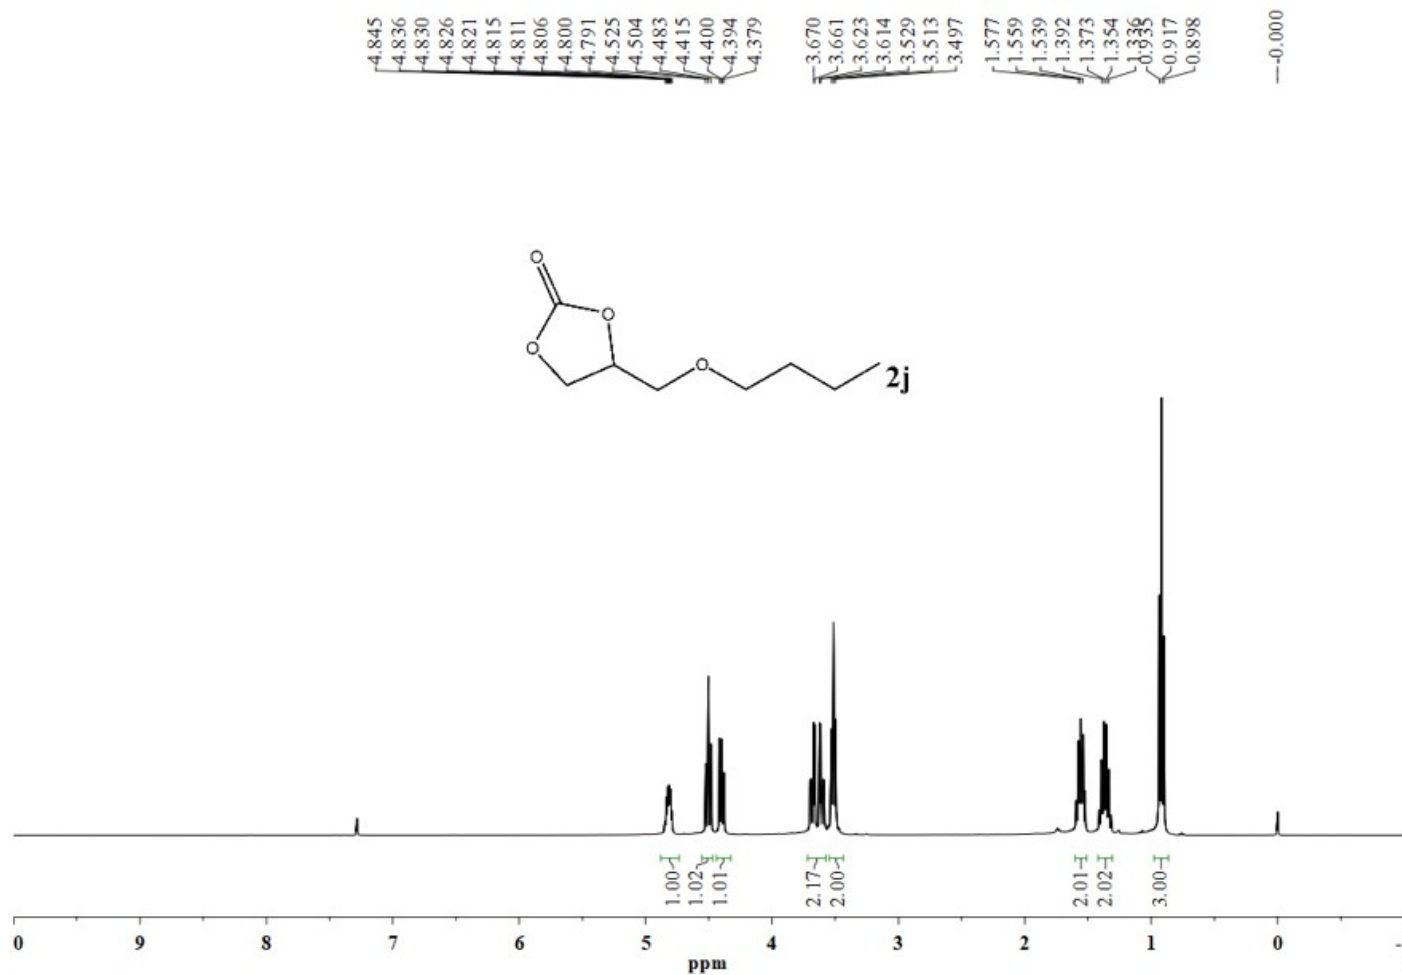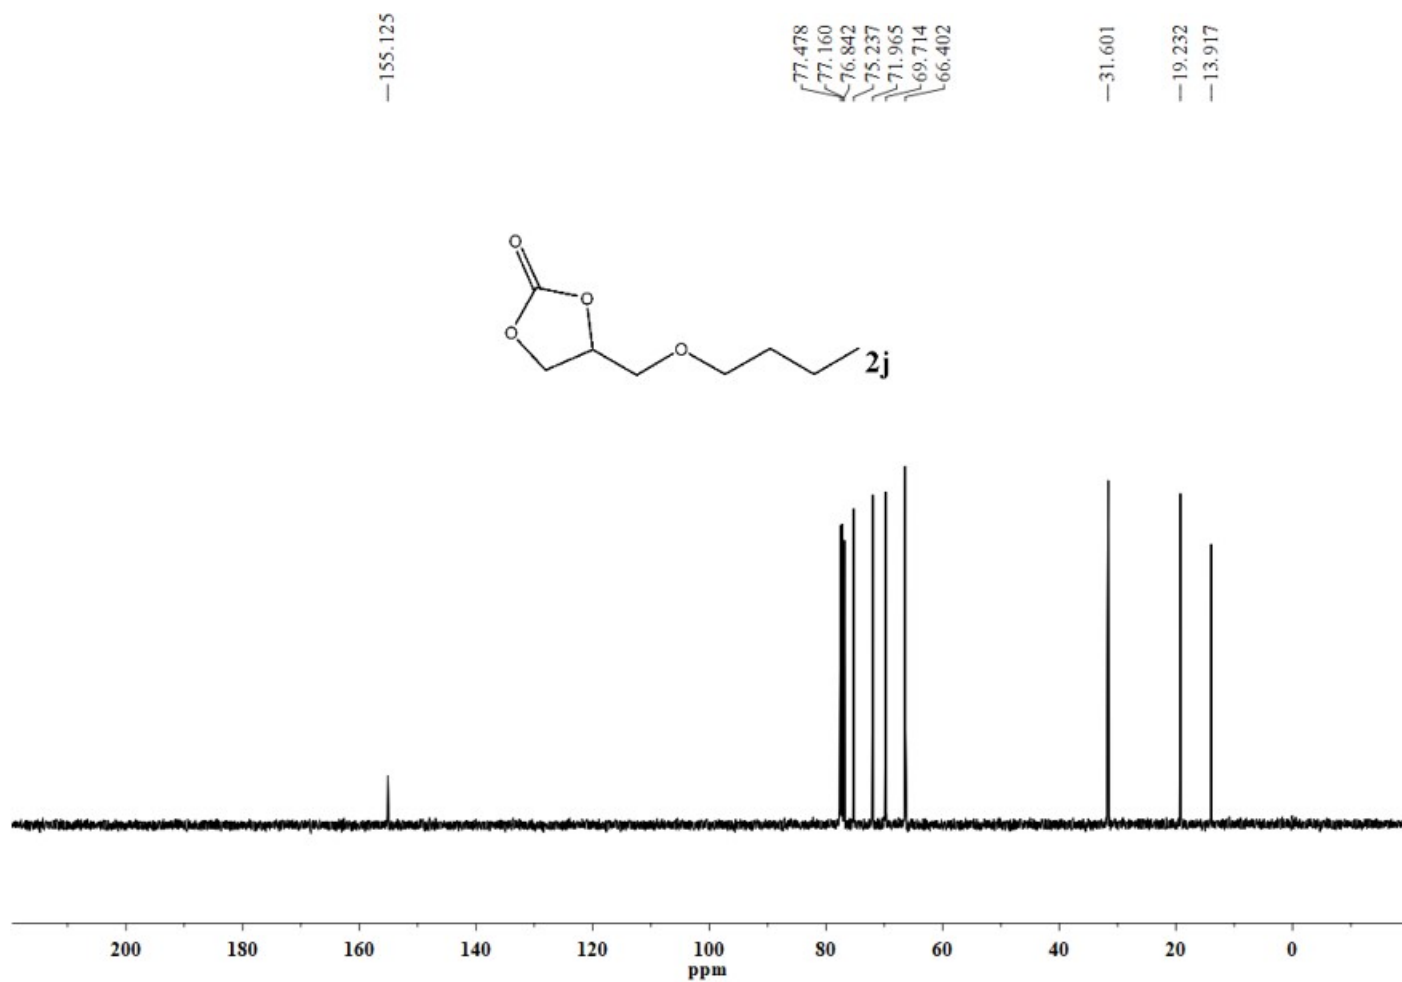

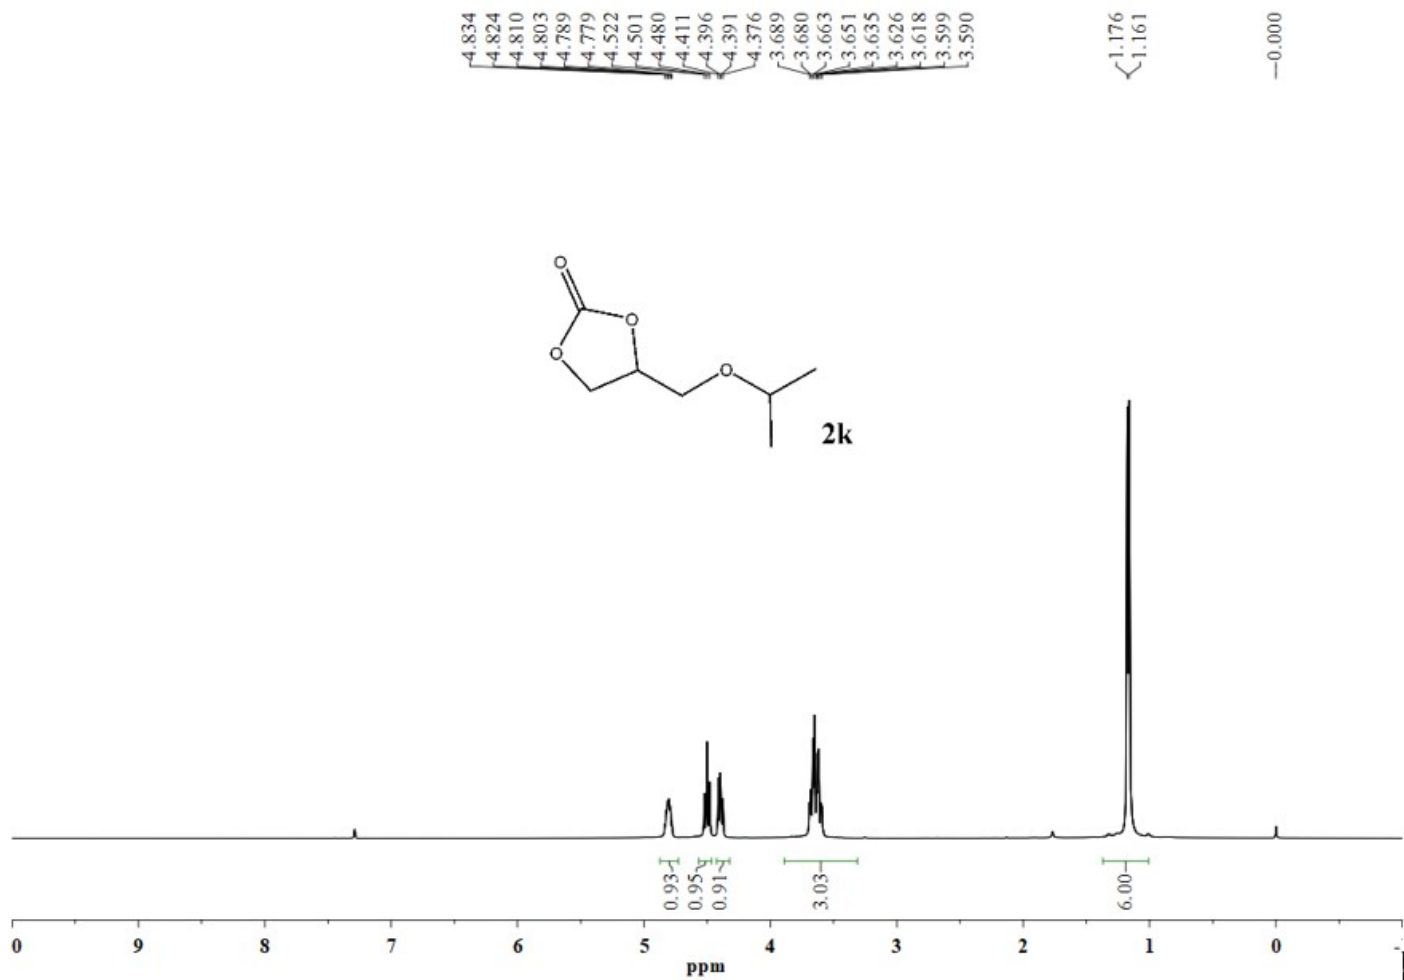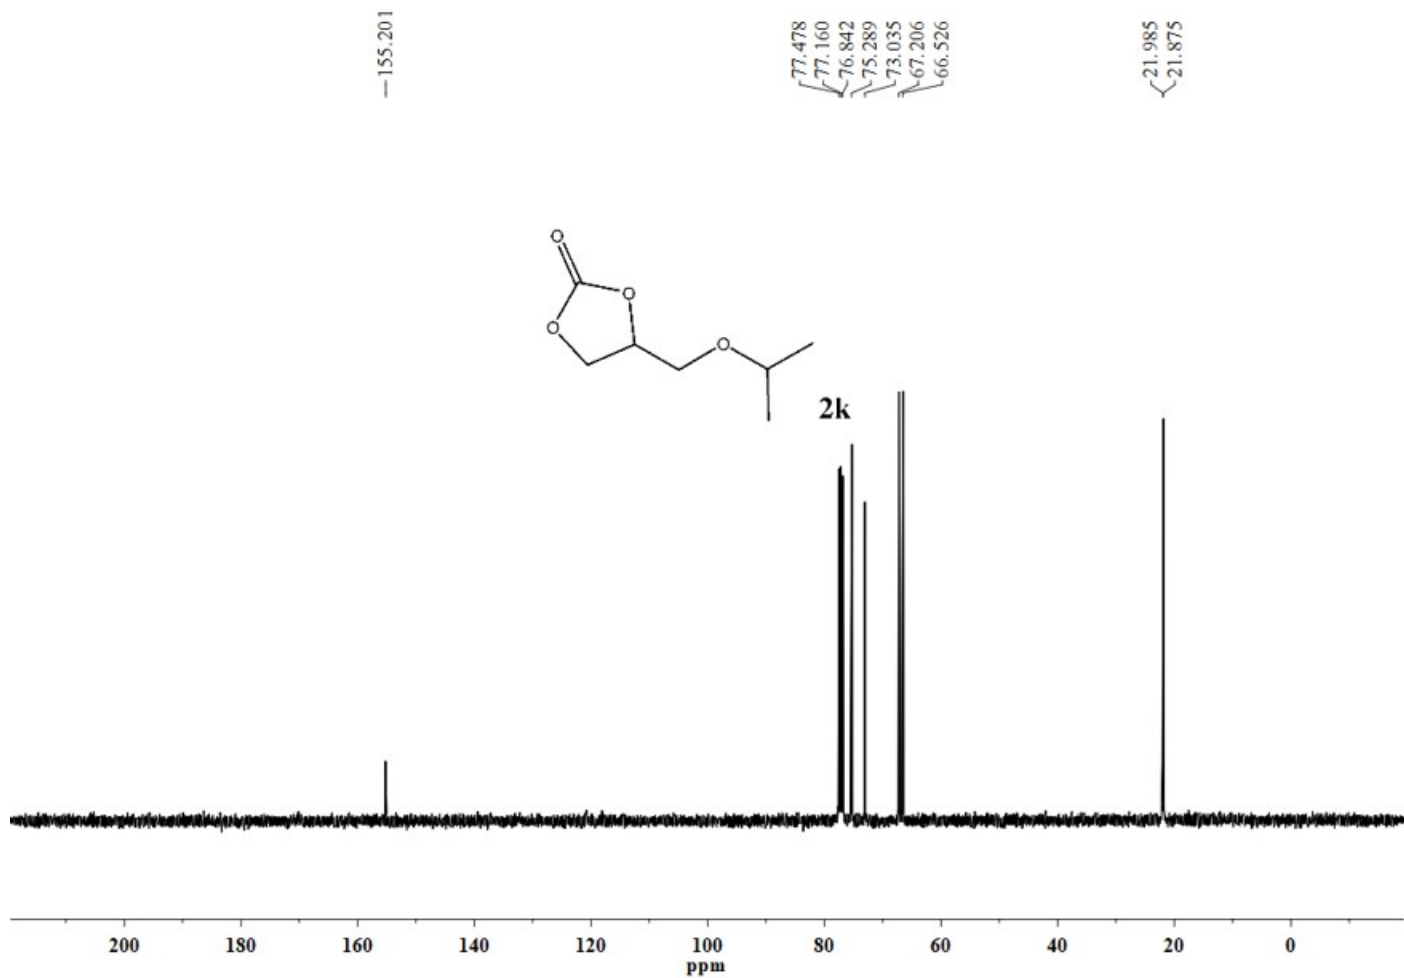

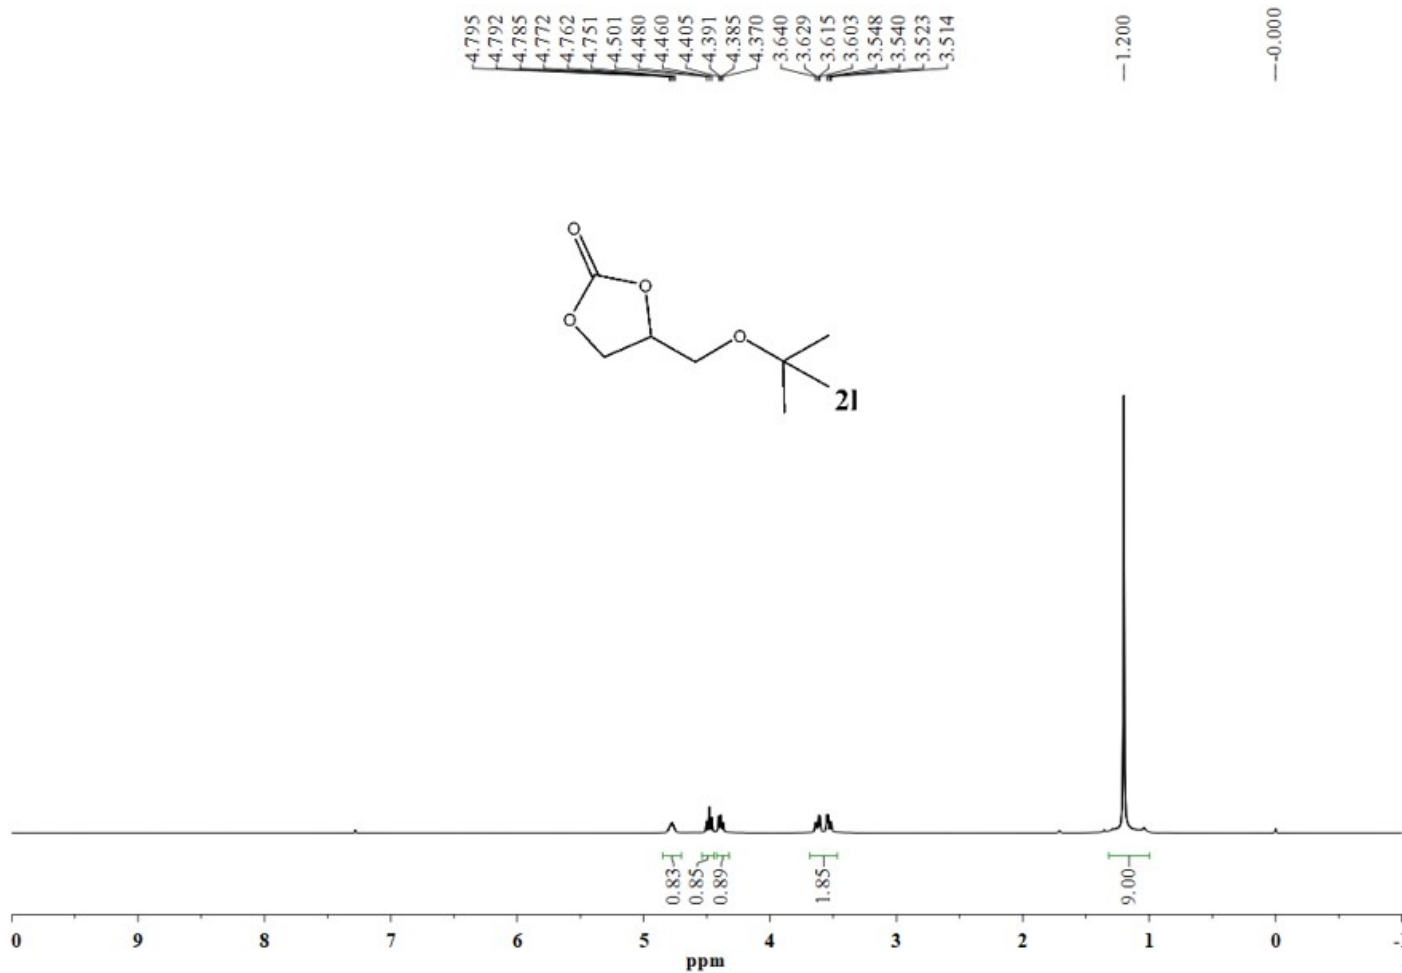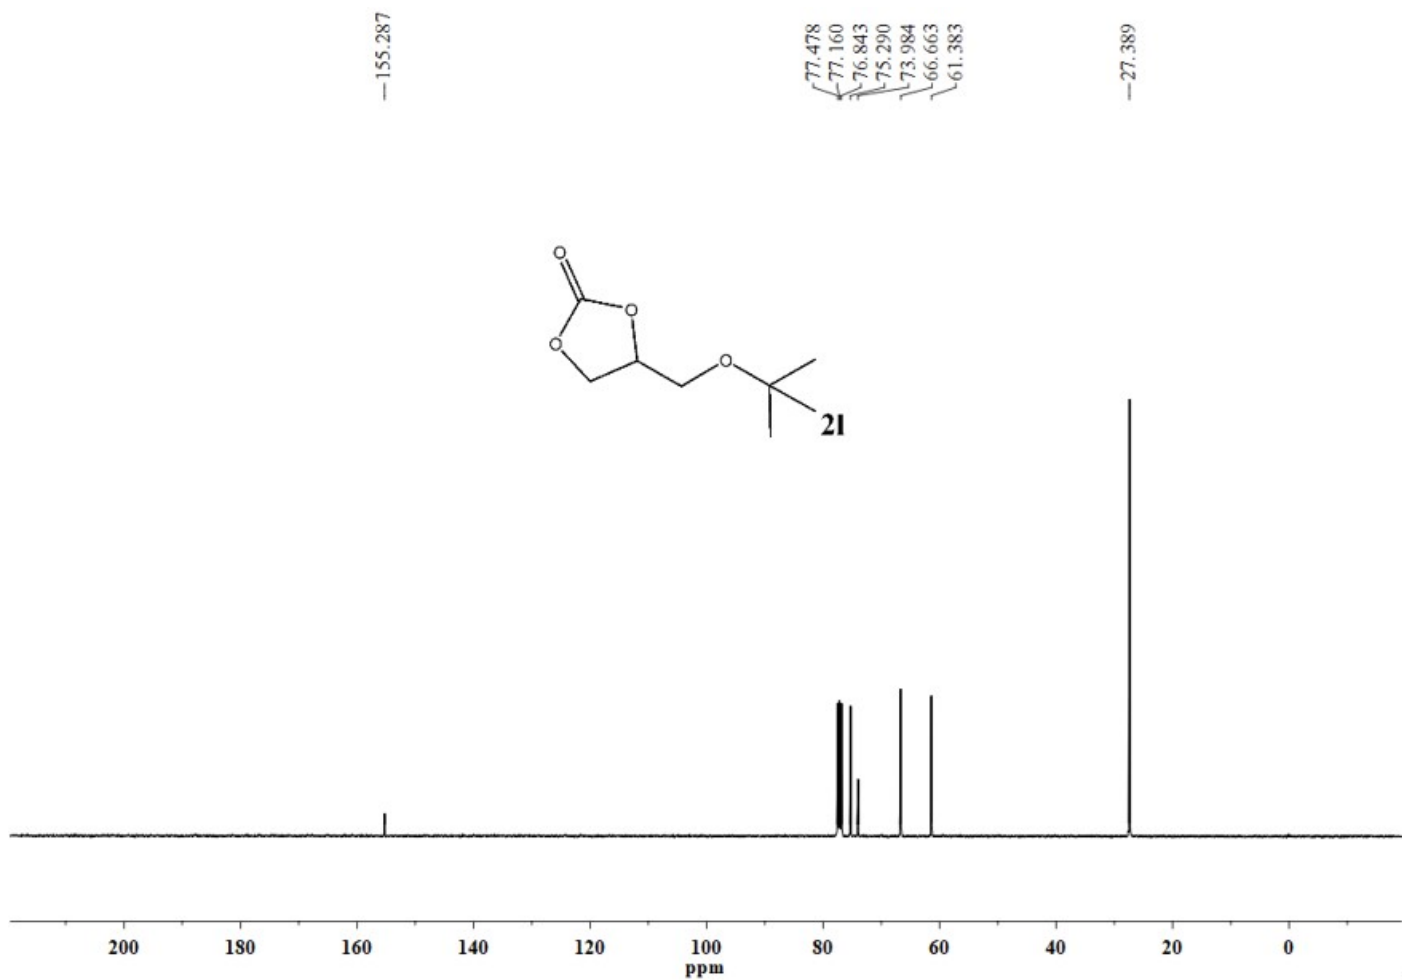

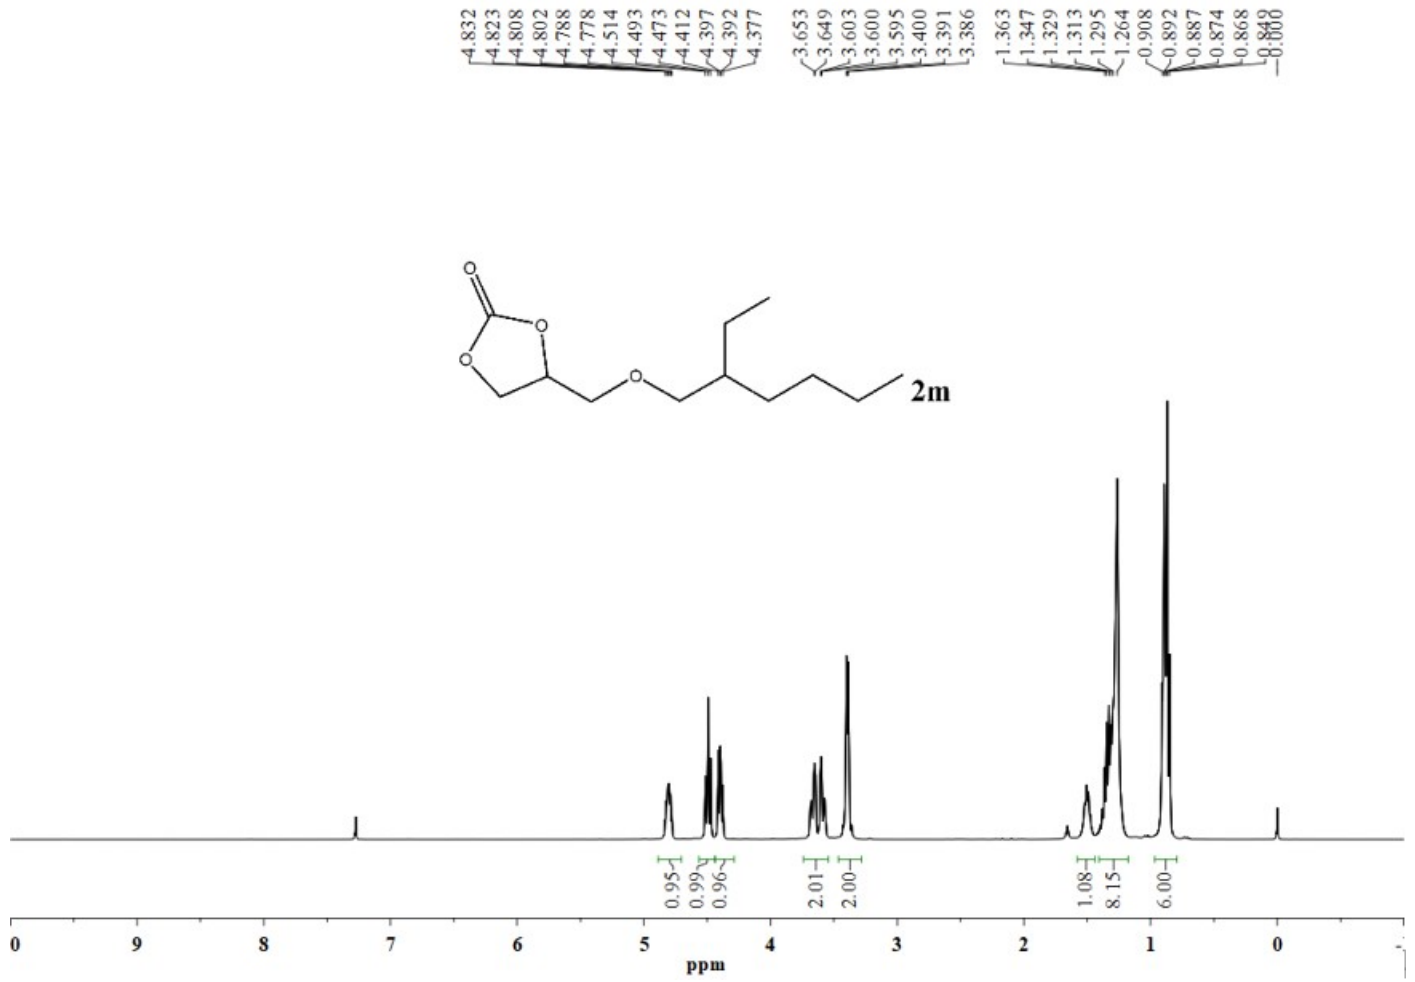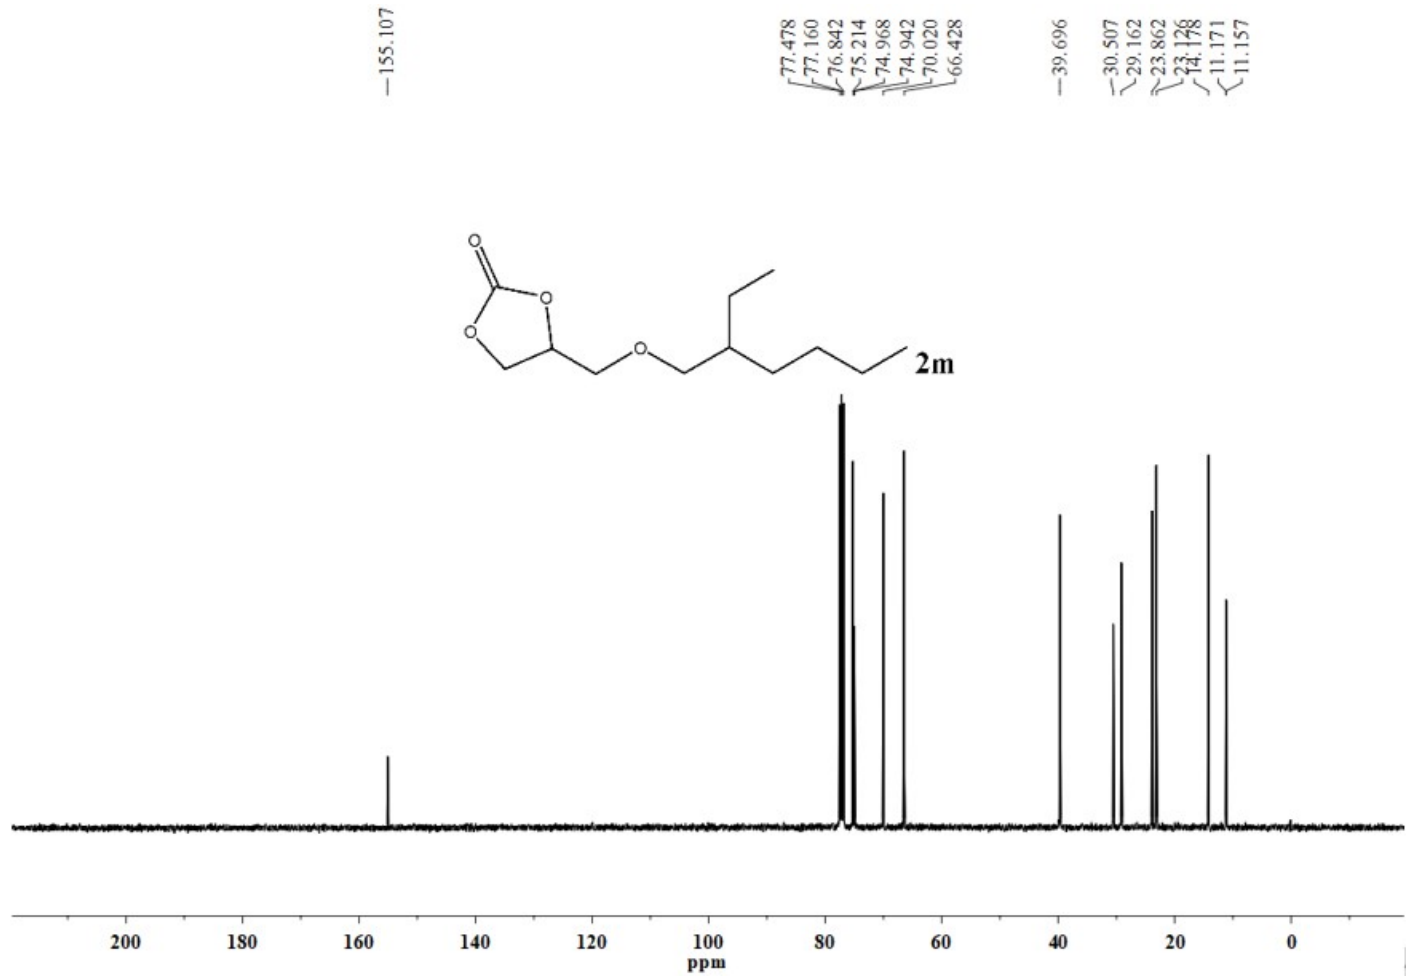

5.925  
5.911  
5.899  
5.885  
5.868  
5.856  
5.842  
5.828  
5.315  
5.312  
5.272  
5.269  
5.244  
5.242  
5.218  
5.216  
4.837  
4.831  
4.533  
4.512  
4.491  
4.424  
4.409  
4.404  
4.388  
4.071  
4.068  
4.064  
4.060  
4.057  
3.711  
3.694  
3.684  
3.643  
3.634  
3.615  
-0.686

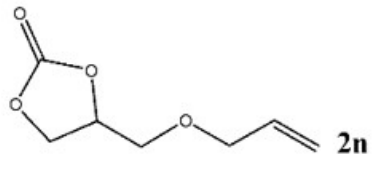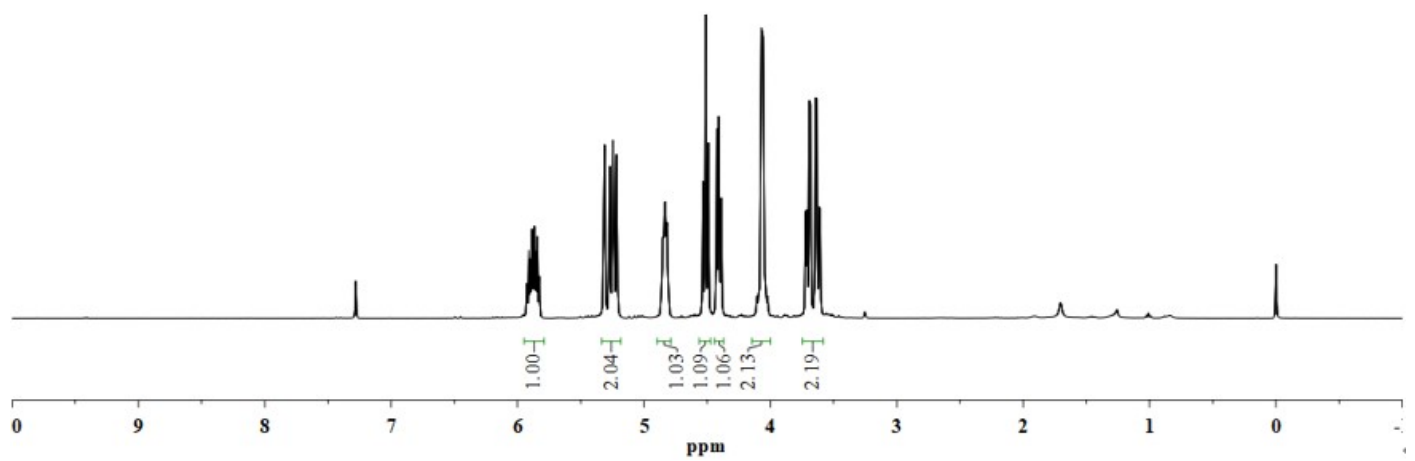

155.050  
133.766  
118.043  
77.478  
77.160  
76.842  
75.135  
72.704  
68.947  
66.387

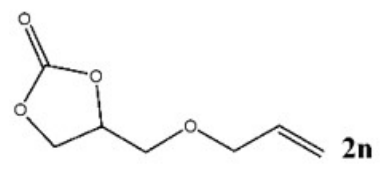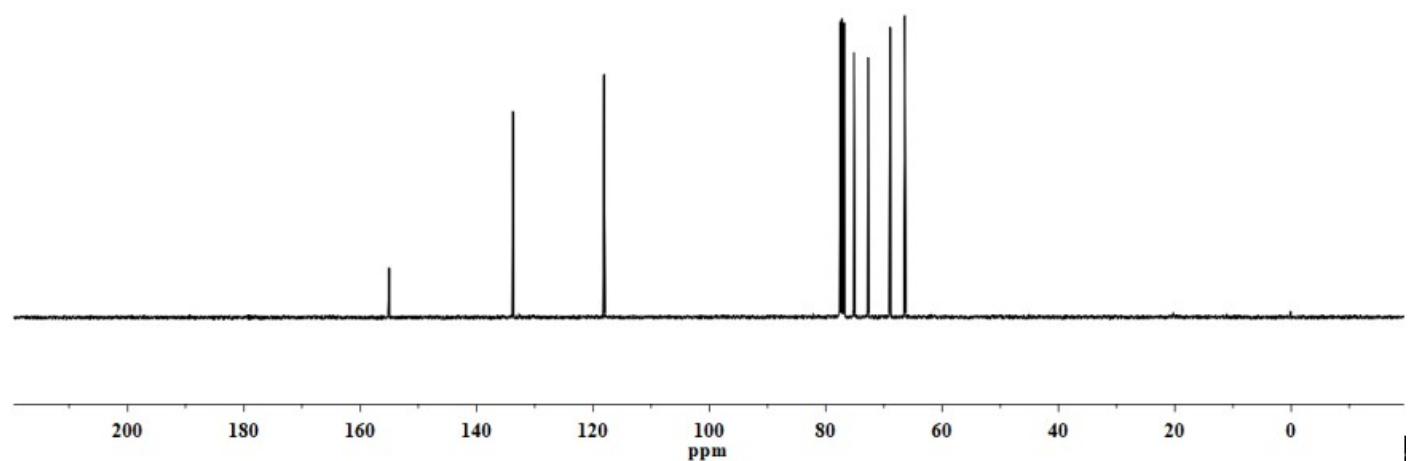

4.829  
4.815  
4.809  
4.805  
4.794  
4.520  
4.499  
4.479  
4.419  
4.404  
4.399  
4.383  
3.789  
3.771  
3.754  
3.737  
3.704  
3.621  
3.487  
3.483  
1.671  
1.650  
1.629  
1.612  
1.256  
1.234  
1.217  
1.199  
0.631  
0.610  
0.589  
0.124  
-0.000

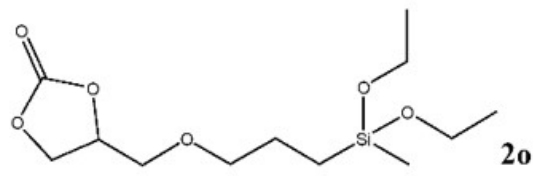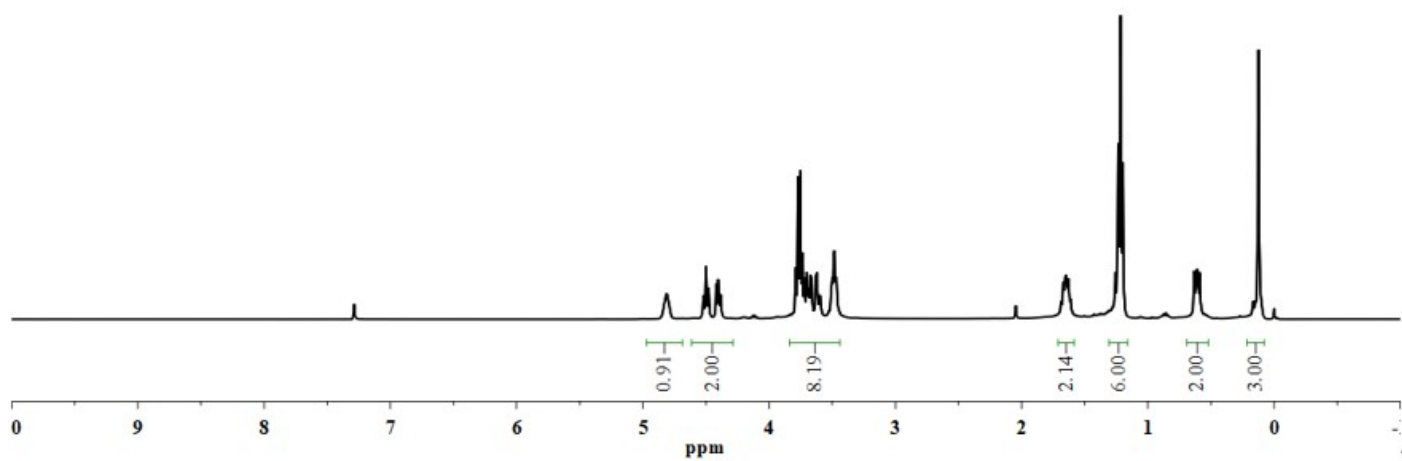

155.064  
77.478  
77.160  
76.842  
75.155  
74.452  
69.681  
66.413  
58.230  
23.015  
18.482  
9.872  
4.859

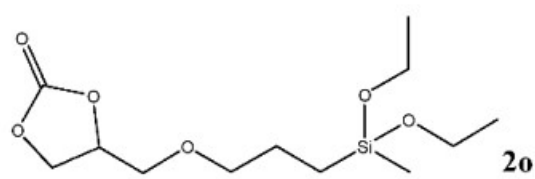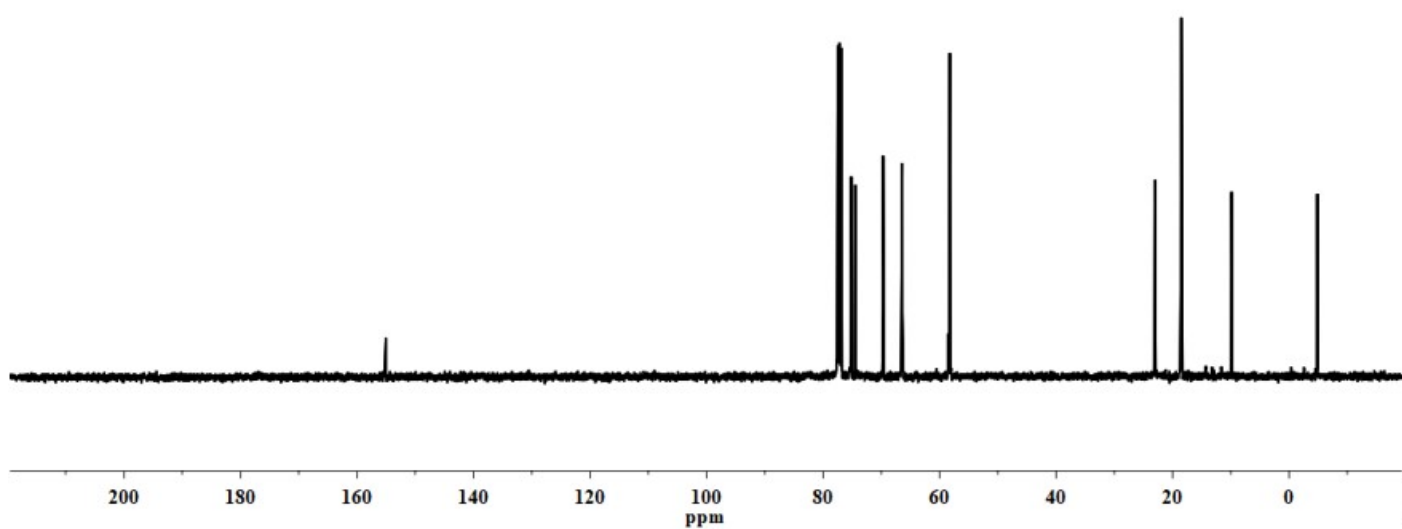

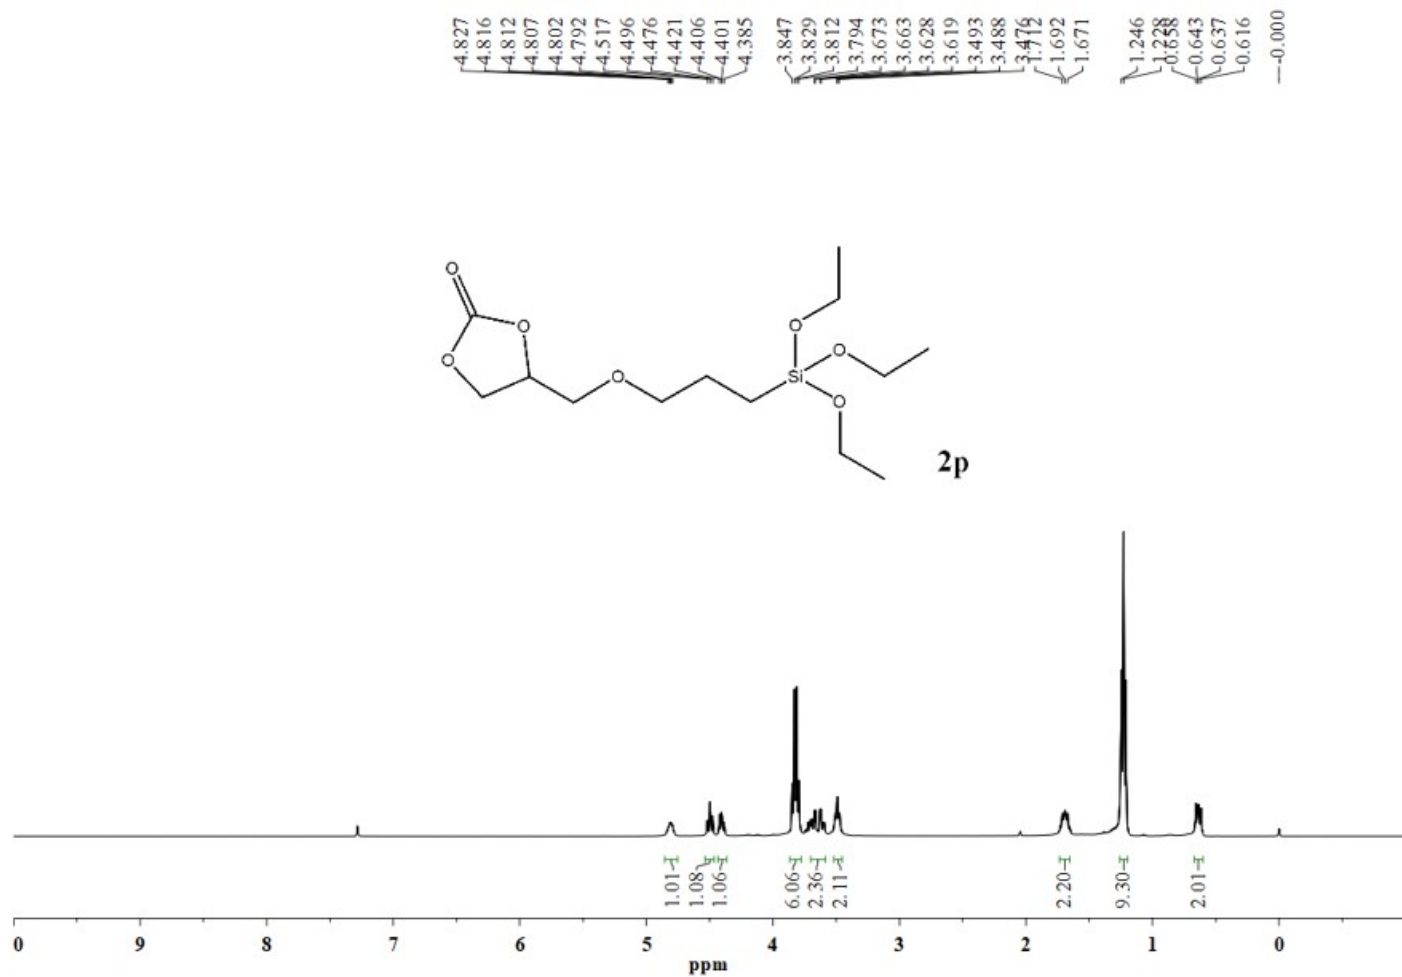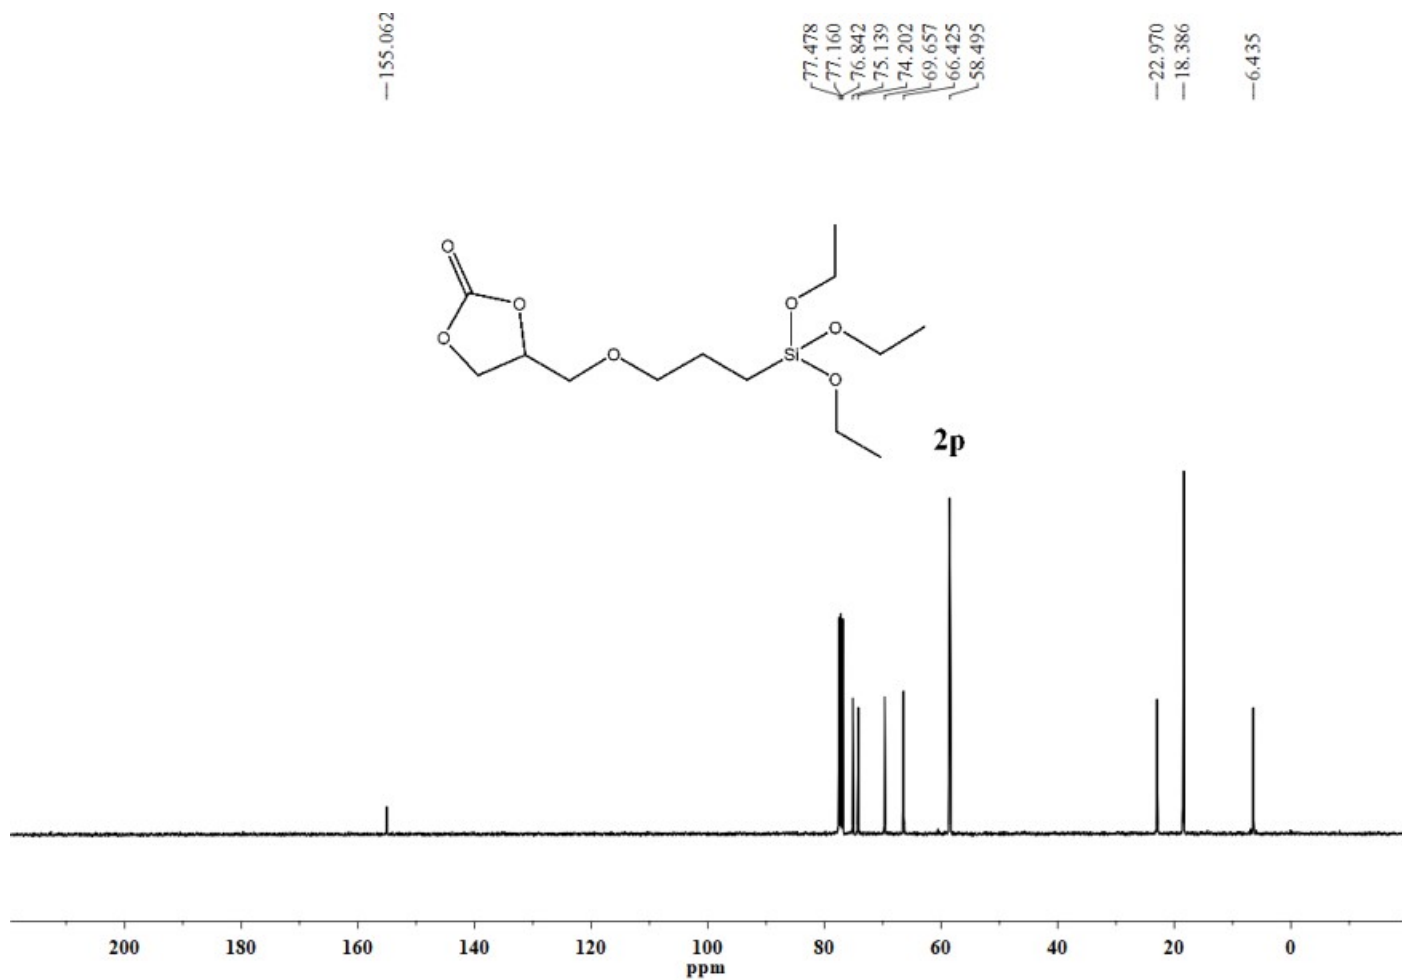



## 5. References

1. X. Cui, X. Dai, A.-E. Surkus, K. Junge, C. Kreyenschulte, G. Agostini, N. Rockstroh and M. Beller, *Chin. J. Catal.*, 2019, **40**, 1679-1685.
2. R. Ma, L.-N. He and Y.-B. Zhou, *Green Chem.*, 2016, **18**, 226-231.
3. C. Chen and A. Zhang, *New J. Chem.*, 2021, **45**, 20155-20163.
